# Supplementary material for: Evaluation of the Association Between Gastric Acid Suppression and Risk of Intestinal Colonization With Multidrug-Resistant Microorganisms: A Systematic Review and Meta-analysis
Source: PubMed Central journal article supplement (PMC7042870; doi:10.1001/jamainternmed.2020.0009), 2020-02-24
Supplement: jamainternmed-180-561-s001.pdf [file jamainternmed-180-561-s001.pdf]

## Supplementary Online Content

Willems RPJ, van Dijk K, Ket JCF, Vandembroucke-Grauls CMJE. Evaluation of the association between gastric acid suppression and risk of intestinal colonization with multidrug-resistant microorganisms: a systematic review and meta-analysis. Published online February 24, 2020. *JAMA Intern Med.* doi:10.1001/jamainternmed.2020.0009

**eMethods.** Supplemental Methods

**eTable 1.** Study Distribution According to World Health Organization Region

**eTable 2.** Baseline Characteristics

**eTable 3.** Exposure and Outcome Ascertainment

**eTable 4.** Adjusted Study Results

**eTable 5.** Quality Assessment According to the Modified Newcastle-Ottawa Scale

**eTable 6.** Sensitivity Analyses After Exclusion of Studies on Urinary Tract Infections

**eTable 7.** Sensitivity Analysis by the Leaving-One-Out Method

**eTable 8.** Sensitivity Analysis by Knapp-Hartung Modification

**eFigure 1.** Secondary Analysis

**eFigure 2.** Subgroup Analysis by Design

**eFigure 3.** Subgroup Analysis by Type of Acid Suppressant

**eFigure 4.** Subgroup Analysis by Setting

**eFigure 5.** Sensitivity Analysis of Studies With High Quality

**eFigure 6.** Sensitivity Analyses by Mantel-Haenszel Weighting

**eFigure 7.** Funnel Plot

**eReferences.**

This supplementary material has been provided by the authors to give readers additional information about their work.

## **eMethods. Supplemental Methods**

### **Target Multidrug-Resistant Micro-organisms:**

The following drug-resistant pathogens were eligible for inclusion: (1) plasmid-mediated AmpC- $\beta$ -lactamase-producing or extended-spectrum  $\beta$ -lactamase-producing Enterobacterales (ESBL-E); (2) carbapenemase-producing Enterobacterales (CPE) (ESBL-E and CPE were collectively called multidrug-resistant Enterobacterales, MDR-E); (3) Methicillin-resistant *Staphylococcus aureus* (MRSA); (4) vancomycin-resistant *Staphylococcus aureus* (VRSA); (5) vancomycin-resistant *Enterococcus* (VRE); (6) carbapenem-resistant *Pseudomonas* species (e.g. *Pseudomonas aeruginosa*) and (7) carbapenem-resistant *Acinetobacter* species (e.g. *Acinetobacter baumannii*).

## Search Strategies:

### Search strategy for PubMed (July 8, 2019)

| #  | Searches                                                                                                                                                                                                                                                                                                                                                                                                                                                                                                                                                                                                                                                                                                                                                                                                                                                                                                                                                                       | Results |
|----|--------------------------------------------------------------------------------------------------------------------------------------------------------------------------------------------------------------------------------------------------------------------------------------------------------------------------------------------------------------------------------------------------------------------------------------------------------------------------------------------------------------------------------------------------------------------------------------------------------------------------------------------------------------------------------------------------------------------------------------------------------------------------------------------------------------------------------------------------------------------------------------------------------------------------------------------------------------------------------|---------|
| #1 | "Proton Pump Inhibitors"[Mesh] OR "Proton Pump Inhibitors"[Pharmacological Action] OR proton pump inhibitor*[tiab] OR ppi[tiab] OR ppis[tiab] OR omeprazol*[tiab] OR esomeprazol*[tiab] OR pantoprazol*[tiab] OR lansoprazol*[tiab] OR dexlansoprazol*[tiab] OR rabeprazol*[tiab] OR "Histamine H2 Antagonists"[Mesh] OR "Histamine H2 Antagonists"[Pharmacological Action] OR h2 antagonist*[tiab] OR h2 block*[tiab] OR ranitidin*[tiab] OR cimetidin*[tiab] OR famotidin*[tiab] OR nizatidin*[tiab] OR "Antacids"[Mesh] OR "Antacids"[Pharmacological Action] OR alkalinizing agent*[tiab] OR antacid*[tiab] OR "Anti-Ulcer Agents"[Mesh] OR "Anti-Ulcer Agents"[Pharmacological Action] OR acid suppress*[tiab] OR acid inhibit*[tiab] OR ((h2 receptor*[tiab] OR histamine 2*[tiab] OR "Receptors, Histamine H2"[Mesh]) AND (antagonist*[tiab] OR block*[tiab])) OR h2ra*[tiab] OR anti acid*[tiab] OR anti ulcer*[tiab] OR anti secretory*[tiab] OR antisecretory*[tiab] | 109,415 |
| #2 | "Drug Resistance, Bacterial"[Mesh] OR "beta-Lactam Resistance"[Mesh] OR "beta-Lactamases"[Mesh] OR esbl*[tiab] OR ampc[tiab] OR ((drug[tiab] OR beta lactam*[tiab] OR "carbapenemase" [Supplementary Concept] OR "beta-Lactams"[Mesh] OR carbapenem*[tiab]) AND resist*[tiab] AND bacteria*[tiab]) OR carbenicillinase*[tiab] OR cephalixin amidase*[tiab] OR cephalosporinas*[tiab] OR exopenicillinas*[tiab] OR penicillinas*[tiab] OR "Genes, MDR"[Mesh] OR multidrug efflux pump gene*[tiab] OR multidrug resist*[tiab] OR multi drug resist*[tiab] OR multiple drug resist*[tiab] OR pampc[tiab] OR metallo beta lactamase*[tiab] OR extended spectrum cephalosporin*[tiab] OR expanded spectrum cephalosporin*[tiab] OR methicillin*[tiab] OR vancomycin*[tiab] OR vre*[tiab] OR mrsa*[tiab] OR vrsa*[tiab] OR visa*[tiab] OR mdr*[tiab]                                                                                                                                 | 199,138 |
| #3 | #1 AND #2                                                                                                                                                                                                                                                                                                                                                                                                                                                                                                                                                                                                                                                                                                                                                                                                                                                                                                                                                                      | 1,218   |

### Search strategy for Embase.com (July 8, 2019)

| #  | Searches                                                                                                                                                                                                                                                                                                                                                                                                                                                                                                                                                                                                                                                                                                                                                                                                                                                                                   | Results |
|----|--------------------------------------------------------------------------------------------------------------------------------------------------------------------------------------------------------------------------------------------------------------------------------------------------------------------------------------------------------------------------------------------------------------------------------------------------------------------------------------------------------------------------------------------------------------------------------------------------------------------------------------------------------------------------------------------------------------------------------------------------------------------------------------------------------------------------------------------------------------------------------------------|---------|
| #1 | 'proton pump inhibitor'/exp OR 'histamine h2 receptor antagonist'/exp OR 'antiulcer agent'/exp OR 'proton pump inhibitor*':ti,ab,kw OR ppi:ti,ab,kw OR ppis:ti,ab,kw OR omeprazol*:ti,ab,kw OR esomeprazol*:ti,ab,kw OR pantoprazol*:ti,ab,kw OR lansoprazol*:ti,ab,kw OR dexlansoprazol*:ti,ab,kw OR rabeprazol*:ti,ab,kw OR 'h2 antagonist*':ti,ab,kw OR 'h2 block*':ti,ab,kw OR ranitidin*:ti,ab,kw OR cimetidin*:ti,ab,kw OR famotidin*:ti,ab,kw OR nizatidin*:ti,ab,kw OR 'alkalinizing agent*':ti,ab,kw OR antacid*:ti,ab,kw OR 'acid suppress*':ti,ab,kw OR 'acid inhibit*':ti,ab,kw OR h2ra*:ti,ab,kw OR 'anti acid*':ti,ab,kw OR 'anti ulcer*':ti,ab,kw OR 'anti secretory*':ti,ab,kw OR antisecretory*:ti,ab,kw OR (('h2 receptor*':ti,ab,kw OR 'histamine 2':ti,ab,kw OR 'histamine 2r':ti,ab,kw OR 'histamine h2 receptor'/exp) AND (antagonist*:ti,ab,kw OR block*:ti,ab,kw)) | 291,041 |
| #2 | 'antibiotic resistance'/exp OR 'beta lactamase'/exp OR 'multidrug resistance'/exp OR esbl* OR ampc OR ((drug:ti,ab,kw OR 'beta lactam*':ti,ab,kw OR 'carbapenemase'/exp OR 'beta lactam'/exp OR carbapenem*:ti,ab,kw) AND resist*:ti,ab,kw AND bacteria*:ti,ab,kw) OR carbenicillinase*:ti,ab,kw OR 'cephalexin amidase*':ti,ab,kw OR 'cephalosporinas*':ti,ab,kw OR exopenicillinas*:ti,ab,kw OR penicillinas*:ti,ab,kw OR 'multidrug efflux pump gene*':ti,ab,kw OR 'multidrug resist*':ti,ab,kw OR 'multi drug resist*':ti,ab,kw OR 'multiple drug resist*':ti,ab,kw OR pampc:ti,ab,kw OR 'metallo beta lactamase*':ti,ab,kw OR 'extended spectrum cephalosporin*':ti,ab,kw OR 'expanded spectrum                                                                                                                                                                                       | 32,3977 |

|    |                                                                                                                                                                  |       |
|----|------------------------------------------------------------------------------------------------------------------------------------------------------------------|-------|
|    | cephalosporin*:ti,ab,kw OR methicillin*:ti,ab,kw OR vancomycin*:ti,ab,kw OR vre*:ti,ab,kw OR mrsa*:ti,ab,kw OR vrsa*:ti,ab,kw OR visa*:ti,ab,kw OR mdr*:ti,ab,kw |       |
| #3 | #1 AND #2                                                                                                                                                        | 4,443 |
| #4 | #3 NOT ('conference abstract'/it OR 'conference paper'/it OR 'conference review'/it OR 'editorial'/it OR 'letter'/it OR 'note'/it)                               | 3,269 |

### Search strategy for Clarivate Analytics Web of Science Core Collection (July 8, 2019)

Indexes=SCI-EXPANDED, SSCI, A&HCI, ESCI Timespan=All years

| #  | Searches                                                                                                                                                                                                                                                                                                                                                                                                                                                                                                                   | Results |
|----|----------------------------------------------------------------------------------------------------------------------------------------------------------------------------------------------------------------------------------------------------------------------------------------------------------------------------------------------------------------------------------------------------------------------------------------------------------------------------------------------------------------------------|---------|
| #1 | <b>TOPIC:</b> ("proton pump inhibitor*" OR ppi OR ppis OR omeprazol* OR esomeprazol* OR pantoprazol* OR lansoprazol* OR dexlansoprazol* OR rabeprazol* OR "h2 antagonist*" OR "h2 block*" OR ranitidin* OR cimetidin* OR famotidin* OR nizatidin* OR "alkalinizing agent*" OR antacid* OR "acid suppress*" OR "acid inhibit*" OR h2ra* OR "anti acid*" OR "anti ulcer*" OR "anti secretory*" OR antisecretory* OR (("h2 receptor*" OR "histamine 2" OR "histamine 2r") NEAR/3 (antagonist* OR block*)))                    | 75,976  |
| #2 | <b>TOPIC:</b> (esbl* OR ampc OR ((drug OR "beta lactam*" OR carbapenem*) NEAR/3 resist* NEAR/3 bacteria*) OR carbenicillinase* OR "cephalexin amidase*" OR "cephalosporinas*" OR exopenicillinas* OR penicillinas* OR "multidrug efflux pump gene*" OR "multidrug resist*" OR "multi drug resist*" OR "multiple drug resist*" OR pampc OR "metallo beta lactamase*" OR "extended spectrum cephalosporin*" OR "expanded spectrum cephalosporin*" OR methicillin* OR vancomycin* OR vre* OR mrsa* OR vrsa* OR visa* OR mdr*) | 164,639 |
| #3 | #1 AND #2                                                                                                                                                                                                                                                                                                                                                                                                                                                                                                                  | 702     |

### Search strategy for Wiley Cochrane Library – CENTRAL (July 8, 2019)

| #  | Searches                                                                                                                                                                                                                                                                                                                                                                                                                                                                                                               | Results                        |
|----|------------------------------------------------------------------------------------------------------------------------------------------------------------------------------------------------------------------------------------------------------------------------------------------------------------------------------------------------------------------------------------------------------------------------------------------------------------------------------------------------------------------------|--------------------------------|
| #1 | ("proton pump inhibitor*" OR ppi OR ppis OR omeprazol* OR esomeprazol* OR pantoprazol* OR lansoprazol* OR dexlansoprazol* OR rabeprazol* OR "h2 antagonist*" OR "h2 block*" OR ranitidin* OR cimetidin* OR famotidin* OR nizatidin* OR "alkalinizing agent*" OR antacid* OR "acid suppress*" OR "acid inhibit*" OR h2ra* OR "anti acid*" OR "anti ulcer*" OR "anti secretory*" OR antisecretory* OR (("h2 receptor*" OR "histamine 2" OR "histamine 2r") NEAR/3 (antagonist* OR block*))) :ti,ab,kw                    | 16,153                         |
| #2 | (esbl* OR ampc OR ((drug OR "beta lactam*" OR carbapenem*) NEAR/3 resist* NEAR/3 bacteria*) OR carbenicillinase* OR "cephalexin amidase*" OR "cephalosporinas*" OR exopenicillinas* OR penicillinas* OR "multidrug efflux pump gene*" OR "multidrug resist*" OR "multi drug resist*" OR "multiple drug resist*" OR pampc OR "metallo beta lactamase*" OR "extended spectrum cephalosporin*" OR "expanded spectrum cephalosporin*" OR methicillin* OR vancomycin* OR vre* OR mrsa* OR vrsa* OR visa* OR mdr*) :ti,ab,kw | 7,484                          |
| #3 | #1 AND #2                                                                                                                                                                                                                                                                                                                                                                                                                                                                                                              | 188                            |
|    |                                                                                                                                                                                                                                                                                                                                                                                                                                                                                                                        | <i>Records in CENTRAL: 180</i> |

## **Data Items:**

### **General study characteristics**

Primary author and year of publication, time period of study, location (country, WHO region), study setting and design.

### **Participant characteristics**

Sample size, inclusion and exclusion criteria, baseline values for age, sex, overall comorbidity, ethnicity/race, and prior antibiotic exposure.

### **Exposure**

Definition of exposure, including type of acid suppressant (PPIs, H2RAs, and/or antacids), method of ascertainment of the exposure (medical records, questionnaires, information databases); dose, duration and frequency of use, if possible.

### **Outcome**

Definition of outcome, including target micro-organism and resistance mechanism, method of ascertainment of the outcome, including detection (screening) method, method for antibiotic susceptibility testing with interpretative guidelines used, and method of MDRO characterization (phenotypic or genotypic characterization), sampling method (stools, rectal swabs, perirectal swabs).

### **Outcome measurement details**

Raw numbers (no. of events and no. of non-events, no. of exposed and no. of non-exposed participants), (maximally) adjusted odds ratios (and 95% CIs) including the covariates adjusted for.

## Modified Newcastle-Ottawa Scale:

Depending on study quality, stars were awarded in three main categories: (1) selection of groups, (2) comparability of groups, and (3) ascertainment of either exposure or outcome of interest.

### Assessment scale for case-control studies:

#### Selection

Allocate one star for each numbered item (maximum of 4 stars within this category):

1. Adequate case definition with independent validation ①
2. Consecutive or obviously representative series of cases ①
3. Community controls ①
4. Controls with no history of disease (endpoint) ①

#### Comparability

Allocate one star for each numbered item (maximum of 2 stars within this category):

1. Cases and controls matched in the design and/or adjusted for age and sex in the analysis ①
2. Controlled for antibiotic use or comorbidity ①

#### Exposure

Allocate one star for each numbered item (maximum of 4 stars within this category) [for item 1, either 1 or 2 stars can be allocated]

1. Ascertainment of exposure with (a) secure records ② (2 stars) or (b) structured interviews (blinded fashion) or structured questionnaires ① (1 star)
2. Same method of ascertainment for cases and controls ①
3. Same non-response rate for both groups ①

### Assessment scale for cohort and cross-sectional studies:

#### Selection

Allocate one star for each numbered item (maximum of 4 stars within this category) [for item 3, either 1 or 2 stars can be allocated]

1. Exposed cohort is truly or somewhat representative of the average in the community ①
2. Non-exposed cohort drawn from same community as exposed cohort ①
3. Ascertainment of exposure with (a) secure records ② (2 stars) or (b) structured interviews or structured questionnaires ① (1 star)
4. Outcome of interest not present at baseline ①

#### Comparability

Allocate one star for each numbered item (maximum of 2 stars within this category)

1. Exposed and non-exposed individuals matched in design and/or adjusted for age and sex in the analysis ①
2. Controlled for antibiotic use or comorbidity ①

#### Outcome

Allocate one star for each numbered item (maximum of 4 stars within this category)

1. Assessment of outcome with independent or blind assessment, or confirmation of the outcome by reference to secure records, or record linkage ①
2. Sufficient follow-up duration ①
3. Complete follow-up or loss to follow-up (less than 20%) unlikely to introduce bias ①

#### Scoring and rationale:

First, we did not score follow-up duration in any of the included cohort studies, because there is a lack of evidence regarding a sufficient timeframe to observe acquisition. In addition, an adequate follow-up duration may vary across different risk factors. Second, since exposure and outcome are measured simultaneously, we did not score selection item 4 and outcome item 2 and 3 for cross-sectional studies. Third, we judged secure records to better address exposure ascertainment compared to the risk of recall bias associated with questionnaires. As we expected to encounter several studies using questionnaires (encompassing different time windows of exposure), we modified the scale to add more weight to studies that used secure records or medication verification.

| <b>eTable 1. Study Distribution According to World Health Organization Region</b> |                       |                                            |
|-----------------------------------------------------------------------------------|-----------------------|--------------------------------------------|
| <b>Region<sup>a</sup></b>                                                         | <b>No. of studies</b> | <b>No. of participants (no. of events)</b> |
| European Region <sup>b</sup>                                                      | 13                    | 17227 (2125)                               |
| Region of the Americas                                                            | 10                    | 6148 (1120)                                |
| Western Pacific Region                                                            | 3                     | 6007 (673)                                 |

<sup>a</sup> No studies originate within the African Region, Eastern Mediterranean Region or South-East Asia Region.  
<sup>b</sup> All travel-based studies originate from Europe.

| <b>eTable 2. Baseline Characteristics</b> |                                     |                       |                                          |                            |                                         |                                                                                                                                         |                                                                                                          |
|-------------------------------------------|-------------------------------------|-----------------------|------------------------------------------|----------------------------|-----------------------------------------|-----------------------------------------------------------------------------------------------------------------------------------------|----------------------------------------------------------------------------------------------------------|
| <b>Study</b>                              | <b>Mean Age (SD), y<sup>a</sup></b> | <b>Sex (% female)</b> | <b>Ethnicity or Race (%)<sup>d</sup></b> | <b>Chronic Disease (%)</b> | <b>Antibiotic Use (%)</b>               | <b>Inclusion criteria</b>                                                                                                               | <b>Exclusion criteria</b>                                                                                |
| Arcilla, 2017                             | 51 (NA) <sup>b</sup>                | 54%                   | 93% D                                    | 23%                        | 7% AT during travel                     | Age ≥18 years, travelling for ≥1 week and ≤3 months                                                                                     | Age <18 years, incapacitated subjects                                                                    |
| Ben-Ami, 2006                             | 76 (NA) <sup>b</sup>                | 48%                   | NA                                       | NA                         | 35% AT past 3 months prior to admission | NA                                                                                                                                      | NA                                                                                                       |
| Chanderraj, 2019                          | 58 (NA) <sup>c</sup>                | 43%                   | 82% W 18% NW                             | NA                         | 94% AT unspecified                      | NA                                                                                                                                      | Prior isolation of VRE from sterile site cultures, conversion from VRE negative to positive in <72 hours |
| Cheng, 2016                               | 59 (24)                             | 44%                   | NA                                       | 51%                        | NA                                      | According to extensive criteria for opportunistic screening, safety net screening, and extensive contact tracing during hospitalization | NA                                                                                                       |
| Falk, 2000                                | 44 (18)                             | NA                    | NA                                       | NA                         | NA                                      | NA                                                                                                                                      | NA                                                                                                       |
| Ford, 2015                                | 58 (18–86) <sup>b</sup>             | 41%                   | NA                                       | NA                         | NA                                      | NA                                                                                                                                      | NA                                                                                                       |
| Goodman, 2019                             | 55 (15)                             | 46%                   | 46% W 44% B                              | NA                         | 21% AT past 3 months prior to admission | Age ≥16 years                                                                                                                           | NA                                                                                                       |



|                 |                        |     |    |    |                      |                                                                                                                                                                                                                |                                                                                                |
|-----------------|------------------------|-----|----|----|----------------------|----------------------------------------------------------------------------------------------------------------------------------------------------------------------------------------------------------------|------------------------------------------------------------------------------------------------|
| Hagel, 2019     | 67 (16)                | 56% | NA | NA | NA                   | Age >18 years, external referral, screened for carriage <48 hours of admission to cardiothoracic surgery, gastroenterology-hepatology-infectology and/or geriatric medicine department, expected LOS >48 hours | Multiple admissions, LOS <48 hours                                                             |
| Hamprecht, 2016 | 62 (NA) <sup>b</sup>   | 49% | NA | NA | 36% AT past 6 months | Age ≥18 years, admission to general department                                                                                                                                                                 | Patients from ICUs, dermatology, obstetrics, ophthalmology, otorhinolaryngology and psychiatry |
| Huizinga, 2017  | 65 (NA) <sup>b,c</sup> | 56% | NA | NA | NA                   | Age >18 years, LOS <48 hours or received day care                                                                                                                                                              | Admission >2 days                                                                              |
|                 |                        |     |    |    |                      |                                                                                                                                                                                                                |                                                                                                |

| <b>eTable 2. Baseline Characteristics (continued)</b> |                                     |                       |                                          |                            |                                                                                                         |                                                                                        |                                                                                                                                            |
|-------------------------------------------------------|-------------------------------------|-----------------------|------------------------------------------|----------------------------|---------------------------------------------------------------------------------------------------------|----------------------------------------------------------------------------------------|--------------------------------------------------------------------------------------------------------------------------------------------|
| <b>Study</b>                                          | <b>Mean Age (SD), y<sup>a</sup></b> | <b>Sex (% female)</b> | <b>Ethnicity or Race (%)<sup>d</sup></b> | <b>Chronic Disease (%)</b> | <b>Antibiotic Use (%)</b>                                                                               | <b>Inclusion criteria</b>                                                              | <b>Exclusion criteria</b>                                                                                                                  |
| Kuenzli, 2014                                         | 41 (1–73) <sup>b</sup>              | 56%                   | NA                                       | NA                         | 5% AT during travel                                                                                     | Any age, travel to South Asia (India, Bhutan, Nepal, and Sri Lanka)                    | Travel >5 weeks, travel to other countries than India, Bhutan, Nepal, and Sri Lanka or to more than one of these countries                 |
| Latour, 2019                                          | 86 (35–109) <sup>b</sup>            | 76%                   | NA                                       | 69% CCI >2                 | 23% AT past 3 months                                                                                    | NA                                                                                     | NA                                                                                                                                         |
| Lee, 2018                                             | 71 (NA)                             | 75%                   | NA                                       | NA                         | 27% AT past 3 months                                                                                    | Age ≥ 18 years, clinical diagnosis of UTI at the emergency department                  | UTI with multiple pathogens                                                                                                                |
| McNeil, 2006                                          | 50 (9)                              | 41%                   | 89% W 5% B 3% H 2% A 1% NTA              | NA                         | 57% AT past 6 months prior to positive index culture                                                    | Age >18 years, on the liver transplantation waiting list at the University of Michigan | NA                                                                                                                                         |
| Okamoto, 2017                                         | 62 (15)                             | 47%                   | 26% W 57% B 11% H 8% O                   | NA                         | 76% AT after the last negative surveillance culture screening through the estimated date of acquisition | NA                                                                                     | LOS <72 hours, culture positive for KPC-E prior to admission or prior to positive surveillance culture                                     |
| Östholm-Balkhed, 2013                                 | 54 (18–76) <sup>b</sup>             | 59%                   | NA                                       | NA                         | 7% AT during travel                                                                                     | Age ≥18 years, travel outside Scandinavia for no more than 3 months                    | Absence of two complete samples, pre-travel sample submission >4 months before travel, post-travel sample submission >4 months upon return |
| Prasad, 2016                                          | 75 (23–102) <sup>b</sup>            | 63%                   | 41% W 36% B 10% A 12% H                  | NA                         | NA                                                                                                      | Adults                                                                                 | Signs and symptoms of                                                                                                                      |

|               |                           |     |              |    |                       |               |                                                                                                                                                                |
|---------------|---------------------------|-----|--------------|----|-----------------------|---------------|----------------------------------------------------------------------------------------------------------------------------------------------------------------|
|               |                           |     |              |    |                       |               | diarrhea, Clostridium difficile–associated infection, receiving treatment for Clostridium-difficile infection, residing on the short-term rehabilitation floor |
| Puzniak, 2001 | 59 (18)                   | 50% | 57% W 43% NW | NA | NA                    | LOS >24 hours | Unknown VRE status at the time of admission                                                                                                                    |
| Reuland, 2016 | 50 (18–95) <sup>b,c</sup> | 61% | 90% E        | NA | 15% AT past 12 months | Age ≥18 years | Terminally ill                                                                                                                                                 |

| <b>eTable 2. Baseline Characteristics (continued)</b> |                                     |                       |                                          |                            |                                                        |                                                                                                                                                                                                  |                                                                                                                                                                                                                                                                   |
|-------------------------------------------------------|-------------------------------------|-----------------------|------------------------------------------|----------------------------|--------------------------------------------------------|--------------------------------------------------------------------------------------------------------------------------------------------------------------------------------------------------|-------------------------------------------------------------------------------------------------------------------------------------------------------------------------------------------------------------------------------------------------------------------|
| <b>Study</b>                                          | <b>Mean Age (SD), y<sup>a</sup></b> | <b>Sex (% female)</b> | <b>Ethnicity or Race (%)<sup>d</sup></b> | <b>Chronic Disease (%)</b> | <b>Antibiotic Use (%)</b>                              | <b>Inclusion criteria</b>                                                                                                                                                                        | <b>Exclusion criteria</b>                                                                                                                                                                                                                                         |
| Rodríguez-Baño, 2008                                  | 40 (NA) <sup>b,c</sup>              | 60%                   | NA                                       | 30%                        | 10% AT past 2 months                                   | Age >14 years                                                                                                                                                                                    | Previous isolation of ESBL-E                                                                                                                                                                                                                                      |
| Seekatz, 2018                                         | 63 (15)                             | 45%                   | 64% B 36% NB                             | NA                         | 56% AT between admission and fecal specimen collection | NA                                                                                                                                                                                               | History of acute bacterial or viral colitis (including Clostridium difficile infection), active inflammatory bowel disease <14 days before sample collection, presence of a rectal tube, fecal incontinence device, or colostomy at the time of sample collection |
| Slaughter, 1996                                       | 20% >65 years                       | 33%                   | 80% B 20% O                              | NA                         | NA                                                     | LOS ≥48 hours                                                                                                                                                                                    | NA                                                                                                                                                                                                                                                                |
| Søgaard, 2017                                         | 65 (NA) <sup>b,c</sup>              | 82%                   | 97% NE                                   | 15% CCI >2                 | 70% AT within 31-365 days before index date            | Aged 15-85 years                                                                                                                                                                                 | Age <15 years and age >85 years                                                                                                                                                                                                                                   |
| Tan, 2018                                             | 73 (21–106) <sup>b</sup>            | 46%                   | 77% C                                    | 20% CCI >5                 | NA                                                     | Hospital LOS >48 hours, and residents of the care facilities                                                                                                                                     | NA                                                                                                                                                                                                                                                                |
| Vading, 2016                                          | 49 (NA) <sup>b</sup>                | 68%                   | NA                                       | 21%                        | 9% AT during travel                                    | Age ≥18 years, travel to South-East Asia, Indian subcontinent, northern Africa or Middle East                                                                                                    | Absence of two complete samples                                                                                                                                                                                                                                   |
| Wielders, 2017                                        | 59 (20–72) <sup>b</sup>             | 55%                   | 98% D                                    | 20%                        | 5% AT past 3 months                                    | Aged 18–70 years, living in the eastern part of Noord-Brabant or the northern part of Limburg, inhabitant of a municipality with <30.000 residents, living <10 km of one of the research centers | Working or living on a farm                                                                                                                                                                                                                                       |

Abbreviations: AT, antibiotic treatment; CCI, Charlson Comorbidity Index; LOS, length of stay; NA, not available; SD, standard deviation.

<sup>a</sup> Data indicate mean (SD) unless otherwise specified.

<sup>b</sup> Data presented as median (range).

<sup>c</sup> Age of corresponding controls, which did not significantly differ from the cases of the individual studies.

<sup>d</sup> Ethnicity: Dutch (D), European (E), Northern-European (NE), Chinese (C); Race: White (W), Black (B), Asian (A), Hispanic (H), Native American (NTA), Other (O), NW (Nonwhite), NB (Nonblack).

| <b>eTable 3. Exposure and Outcome Ascertainment</b> |                             |                                          |                                                            |                                                              |                                                             |                                                                            |
|-----------------------------------------------------|-----------------------------|------------------------------------------|------------------------------------------------------------|--------------------------------------------------------------|-------------------------------------------------------------|----------------------------------------------------------------------------|
| <b>Study</b>                                        | <b>Selective enrichment</b> | <b>Detection method</b>                  | <b>Method of antibiotic susceptibility testing</b>         | <b>Interpretative guideline of antibiotic susceptibility</b> | <b>Characterization method</b>                              | <b>Exposure ascertainment</b>                                              |
| Arcilla, 2017                                       | Y                           | ESBL-selective chromogenic agar          | Automated microdilution system and disk diffusion          | NVMM                                                         | Genotypic (microarray, PCR and DNA-sequencing)              | Structured questionnaires                                                  |
| Ben-Ami, 2006                                       | N                           | Antibiotic-supplemented MCK agar         | Disk diffusion                                             | CLSI                                                         | Genotypic (PCR) <sup>b</sup>                                | Medical records and interviews                                             |
| Chanderraj, 2019                                    | N                           | VRE-selective chromogenic agar           | Selective agar                                             | NA                                                           | Phenotypic                                                  | Medical records                                                            |
| Cheng, 2016                                         | Y                           | Antibiotic-supplemented MCK agar         | Disk diffusion                                             | CLSI                                                         | Genotypic (PCR)                                             | Information database                                                       |
| Falk, 2000                                          | Y                           | Bile esculin azide agar                  | Agar dilution method and Etest                             | NA                                                           | Phenotypic                                                  | Medical records                                                            |
| Ford, 2015                                          | N                           | Bile esculin agar                        | Automated microdilution system                             | NA                                                           | Phenotypic                                                  | Information databases                                                      |
| Goodman, 2019                                       | N                           | Antibiotic disk-supplemented MCK agar    | Disk diffusion and modified carbapenem inactivation method | CLSI                                                         | Genotypic (microarray)                                      | Medical records                                                            |
| Hagel, 2019                                         | N                           | ESBL- and KPC-selective chromogenic agar | Automated microdilution system                             | NA                                                           | Genotypic (microarray)                                      | Medical records                                                            |
| Hamprecht, 2016                                     | N                           | ESBL-selective chromogenic agar          | Automated microdilution system and disk diffusion          | EUCAST                                                       | Genotypic (PCR)                                             | Structured questionnaires                                                  |
| Huizinga, 2017                                      | Y                           | ESBL-selective screening agar            | Automated microdilution system and disk diffusion          | EUCAST, NVMM                                                 | Genotypic (microarray)                                      | Medical records and home-medication lists verified by assistant pharmacist |
| Kuenzli, 2014                                       | N                           | ESBL-selective chromogenic agar          | Automated microdilution system, Etest, disk diffusion      | EUCAST, CLSI                                                 | Genotypic (microarray, PCR and DNA-sequencing) <sup>b</sup> | Structured questionnaires                                                  |

|              |   |                                                     |                                    |      |                                |                                                                        |
|--------------|---|-----------------------------------------------------|------------------------------------|------|--------------------------------|------------------------------------------------------------------------|
|              |   |                                                     | and modified Hodge test            |      |                                |                                                                        |
| Latour, 2019 | N | ESBL-, CPE-, and OXA-48-selective chromogenic agars | Disk diffusion and Carba NP method | CLSI | Genotypic (microarray and PCR) | Structured questionnaires completed by nurse or coordinating physician |

| <b>eTable 3. Exposure and Outcome Ascertainment (continued)</b> |                             |                                                                                       |                                                        |                                                              |                                    |                                                    |
|-----------------------------------------------------------------|-----------------------------|---------------------------------------------------------------------------------------|--------------------------------------------------------|--------------------------------------------------------------|------------------------------------|----------------------------------------------------|
| <b>Study</b>                                                    | <b>Selective enrichment</b> | <b>Detection method</b>                                                               | <b>Method of antibiotic susceptibility testing</b>     | <b>Interpretative guideline of antibiotic susceptibility</b> | <b>Characterization method</b>     | <b>Exposure ascertainment</b>                      |
| Lee, 2018                                                       | N                           | Eosin methylene blue agar                                                             | Broth microdilution method and disk diffusion          | CLSI                                                         | Phenotypic                         | Medical records                                    |
| McNeil, 2006                                                    | Y                           | Bile esculin azide selective agar                                                     | Selective agar                                         | NA                                                           | Phenotypic                         | Medical records and information database           |
| Okamoto, 2017                                                   | N                           | Antibiotic disk-supplemented MCK agar                                                 | Automated microdilution system                         | NA                                                           | Genotypic (PCR)                    | Medical records                                    |
| Östholm-Balkhed, 2013                                           | N                           | ESBL-selective chromogenic agar and antibiotic disk-supplemented chromogenic UTI agar | Etest                                                  | EUCAST                                                       | Genotypic (PCR)                    | Structured questionnaires                          |
| Prasad, 2016                                                    | Y                           | MCK agar                                                                              | Automated microdilution system and modified Hodge test | CLSI                                                         | Genotypic (PCR)                    | Medical records                                    |
| Puzniak, 2001                                                   | N                           | Bile esculin azide selective agar                                                     | Selective agar                                         | NA                                                           | Phenotypic                         | Medical informatics and information databases      |
| Reuland, 2016                                                   | Y                           | ESBL-selective screening agar                                                         | Automated microdilution system and disk diffusion      | EUCAST, NVMM                                                 | Genotypic (PCR and DNA-sequencing) | Structured questionnaires and information database |
| Rodríguez-Baño, 2008                                            | N                           | Antibiotic-supplemented MCK agar                                                      | Disk diffusion                                         | CLSI                                                         | Genotypic (PCR and DNA-sequencing) | Structured questionnaires                          |
| Seekatz, 2018                                                   | N                           | MCK agar                                                                              | Automated microdilution system                         | NA                                                           | Genotypic (PCR)                    | Medical records                                    |
| Slaughter, 1996                                                 | N                           | Bile esculin azide agar and antibiotic-supplemented                                   | Agar dilution method and disk diffusion                | NCCLS                                                        | Genotypic (PCR)                    | Medical records                                    |



|               |   |                                       |                                |              |                 |                      |
|---------------|---|---------------------------------------|--------------------------------|--------------|-----------------|----------------------|
|               |   | Columbia colistin-nalidixic acid agar |                                |              |                 |                      |
| Søgaard, 2017 | N | NA                                    | Disk diffusion and Etest       | EUCAST, SRGA | Phenotypic      | Information database |
| Tan, 2018     | N | VRE-selective chromogenic agar        | Automated microdilution system | NR           | Genotypic (PCR) | Medical records      |

| <b>eTable 3. Exposure and Outcome Ascertainment (continued)</b>                                                                                                                                                                                                                                                                                                                  |                             |                                                                                  |                                                    |                                                              |                                                |                                                                                            |
|----------------------------------------------------------------------------------------------------------------------------------------------------------------------------------------------------------------------------------------------------------------------------------------------------------------------------------------------------------------------------------|-----------------------------|----------------------------------------------------------------------------------|----------------------------------------------------|--------------------------------------------------------------|------------------------------------------------|--------------------------------------------------------------------------------------------|
| <b>Study</b>                                                                                                                                                                                                                                                                                                                                                                     | <b>Selective enrichment</b> | <b>Detection method</b>                                                          | <b>Method of antibiotic susceptibility testing</b> | <b>Interpretative guideline of antibiotic susceptibility</b> | <b>Characterization method</b>                 | <b>Exposure ascertainment</b>                                                              |
| Vading, 2016                                                                                                                                                                                                                                                                                                                                                                     | Y <sup>a</sup>              | ESBL-selective chromogenic agar                                                  | Automated microdilution system and disk diffusion  | EUCAST                                                       | Genotypic (microarray)                         | Structured questionnaires                                                                  |
| Wielders, 2017                                                                                                                                                                                                                                                                                                                                                                   | Y                           | Antibiotic-supplemented MCK agar and E. coli/coliform selective chromogenic agar | Disk diffusion                                     | CLSI                                                         | Genotypic (microarray, PCR and DNA-sequencing) | Structured questionnaires and verification of medication use during research centre visits |
| Abbreviations: CLSI, Clinical and Laboratory Standards Institute; EUCAST, European Committee on Antimicrobial Susceptibility Testing; MCK, MacConkey; NA, not available; N, no; NCCLS, National Committee for Clinical Laboratory Standards; NVMM, Dutch Society for Medical Microbiology; PCR, polymerase chain reaction; SRGA, Swedish Reference Group of Antibiotics; Y, yes. |                             |                                                                                  |                                                    |                                                              |                                                |                                                                                            |
| <sup>a</sup> Selective enrichment was performed for carbapenemase detection only.                                                                                                                                                                                                                                                                                                |                             |                                                                                  |                                                    |                                                              |                                                |                                                                                            |
| <sup>b</sup> Studies in which genotypic characterization was performed for a selected number of isolates that were collected.                                                                                                                                                                                                                                                    |                             |                                                                                  |                                                    |                                                              |                                                |                                                                                            |

| <b>eTable 4. Adjusted Study Results</b> |                            |                  |                                 |                                                                                                                                                                                                                                                                                                             |
|-----------------------------------------|----------------------------|------------------|---------------------------------|-------------------------------------------------------------------------------------------------------------------------------------------------------------------------------------------------------------------------------------------------------------------------------------------------------------|
| <b>Study</b>                            | <b>Outcome<sup>a</sup></b> | <b>Exposure</b>  | <b>OR (95% CI)</b>              | <b>Adjustment</b>                                                                                                                                                                                                                                                                                           |
| Arcilla, 2016                           | ESBL-E                     | Acid suppression | 1.17 (0.84 – 1.63) <sup>c</sup> | Adjusted for age, sex, antibiotic use, comorbidity, travel                                                                                                                                                                                                                                                  |
| Ben-Ami, 2006                           | ESBL-E                     | H2RAs            | 2.80 (1.10 – 7.40)              | Adjusted for antibiotic use, chronic renal insufficiency, liver disease, poor functional status                                                                                                                                                                                                             |
| Cheng, 2016                             | CPE                        | PPIs             | 2.84 (1.72 – 4.71)              | Adjusted for age, sex, antibiotic use, prior hospital admission, presence of indwelling device, LTCF residency                                                                                                                                                                                              |
| Falk, 2000                              | VRE                        | Antacids         | 24.20 (2.90 – ∞) <sup>d</sup>   | Adjusted for presence of diarrhea                                                                                                                                                                                                                                                                           |
| Hamprecht, 2016                         | ESBL-E                     | Acid suppression | 1.22 (1.07 – 1.40)              | Adjusted for age, sex, antibiotic use, travel, history of MDRO colonization or infection, LTCF stay, hospital center                                                                                                                                                                                        |
| Huizinga, 2016                          | ESBL-E                     | PPIs and H2RAs   | 3.69 (1.56 – 8.73) <sup>c</sup> | Adjusted for age, sex, antibiotic use, prior hospital admission                                                                                                                                                                                                                                             |
|                                         |                            | PPIs             | 3.89 (1.65 – 9.19) <sup>c</sup> | Adjusted for age, sex, antibiotic use, prior hospital admission                                                                                                                                                                                                                                             |
| Latour, 2019                            | ESBL-E                     | PPIs and H2RAs   | 1.74 (1.22 – 2.48)              | Adjusted for antibiotic use, mobility                                                                                                                                                                                                                                                                       |
| McNeil, 2006                            | VRE                        | PPIs             | 2.70 (1.20 – 6.10)              | Adjusted for antibiotic use, hospital admission in liver unit, ERCP or paracentesis                                                                                                                                                                                                                         |
| Reuland, 2016                           | ESBL-E                     | PPIs and H2RAs   | 1.90 (1.10 – 3.30)              | Adjusted for age, sex, antibiotic use, travel                                                                                                                                                                                                                                                               |
|                                         |                            | PPIs             | 1.90 (1.10 – 3.20)              | Adjusted for age, sex, antibiotic use, travel                                                                                                                                                                                                                                                               |
| Søgaard, 2017                           | ESBL-E <sup>b</sup>        | PPIs             | 1.21 (0.91 – 1.60)              | Adjusted for age, sex, antibiotic use, comorbidity, cancer, liver diseases, COPD, immunosuppressants, prior inpatient hospital admission, citizenship                                                                                                                                                       |
| Tan, 2018                               | VRE                        | PPIs             | 1.63 (1.24 – 2.15)              | Adjusted for age, sex, comorbidity, longer duration of antibiotic therapy, length of stay of >14 days, higher number of beds per room, prior VRE and MRSA carriage, recent surgery, presence of a skin ulcer, use of an indwelling urinary catheter, year of screening, healthcare facility                 |
| Wielders, 2017                          | ESBL-E                     | PPIs             | 1.84 (1.05 – 3.23)              | Adjusted for age, sex, travel, place of residence during youth, animal contact during work or study, lived on a farm during childhood, performed jobs on a farm during childhood, dog owner, kept cows or horses for a hobby during recent years, prior visit to a farm, living close to one or more farms. |

Abbreviations: CI, confidence interval; CPE, carbapenemase-producing Enterobacterales; ERCP, endoscopic, retrograde cholangiopancreatogram; ESBL-E, extended-spectrum β-lactamase-producing Enterobacterales; H2RA, histamine<sub>2</sub> receptor antagonist, LTCF, long-term care facility; MDRO, multidrug-resistant micro-organism; MRSA, methicillin-resistant *Staphylococcus aureus*; PPI, proton pump inhibitor; VRE, vancomycin-resistant enterococci.

<sup>a</sup> Outcome refers to intestinal carriage unless reported otherwise.  
<sup>b</sup> Urinary tract infection (surrogate) outcome.  
<sup>c</sup> Results of data received from study authors, with more complete confounding adjustments in addition to those presented in the original papers.  
<sup>d</sup> Multivariable analysis was conducted using exact logistic regression



| eTable 5. Quality Assessment According to the Modified Newcastle-Ottawa Scale <sup>a</sup> |           |    |    |    |               |    |                               |       |       |                            |              |
|--------------------------------------------------------------------------------------------|-----------|----|----|----|---------------|----|-------------------------------|-------|-------|----------------------------|--------------|
| Study                                                                                      | Selection |    |    |    | Comparability |    | Exposure/Outcome <sup>b</sup> |       |       | Overall Score <sup>c</sup> | Risk of Bias |
|                                                                                            | S1        | S2 | S3 | S4 | C1            | C2 | E1/O1                         | E2/O2 | E3/O3 |                            |              |
| <b>Case-control studies</b>                                                                |           |    |    |    |               |    |                               |       |       | (Max. of 10)               |              |
| Chanderraj et al, 2019                                                                     | 1         | 1  | 1  | 1  | 0             | 0  | 2                             | 1     | 0     | 7                          | Low          |
| Cheng et al, 2016                                                                          | 1         | 0  | 1  | 0  | 1             | 1  | 2                             | 1     | 0     | 7                          | Low          |
| Falk et al, 2000                                                                           | 1         | 0  | 1  | 1  | 0             | 0  | 2                             | 1     | 0     | 6                          | High         |
| Lee et al, 2018                                                                            | 1         | 1  | 1  | 1  | 1             | 0  | 2                             | 1     | 0     | 8                          | Low          |
| Okamoto et al, 2017                                                                        | 1         | 1  | 1  | 1  | 0             | 0  | 2                             | 1     | 0     | 7                          | Low          |
| Søgaard et al, 2017                                                                        | 1         | 1  | 1  | 1  | 1             | 1  | 2                             | 1     | 0     | 9                          | Low          |
| Seekatz et al, 2018                                                                        | 1         | 1  | 1  | 1  | 0             | 0  | 2                             | 1     | 0     | 7                          | Low          |
| <b>Cohort studies</b>                                                                      |           |    |    |    |               |    |                               |       |       | (Max. of 10)               |              |
| Arcilla et al, 2016                                                                        | 1         | 1  | 1  | 1  | 1             | 0  | 1                             | 0     | 1     | 7                          | Low          |
| Ford et al, 2015                                                                           | 0         | 1  | 2  | 0  | 0             | 1  | 1                             | 0     | 0     | 5                          | High         |
| Hagel et al, 2019                                                                          | 1         | 1  | 2  | 1  | 0             | 0  | 1                             | 0     | 0     | 6                          | High         |
| Kuenzli et al, 2014                                                                        | 1         | 1  | 1  | 1  | 0             | 0  | 1                             | 0     | 1     | 6                          | High         |
| McNeil et al, 2005                                                                         | 0         | 1  | 2  | 0  | 0             | 1  | 1                             | 0     | 1     | 6                          | High         |
| Östholm-Balkhed et al, 2013                                                                | 1         | 1  | 1  | 1  | 0             | 0  | 1                             | 0     | 1     | 6                          | High         |
| Puzniak et al, 2001                                                                        | 1         | 1  | 2  | 1  | 0             | 0  | 1                             | 0     | 1     | 7                          | Low          |
| Slaughter et al, 1996                                                                      | 1         | 1  | 2  | 1  | 0             | 0  | 1                             | 0     | 1     | 7                          | Low          |
| Vading et al, 2016                                                                         | 1         | 1  | 1  | 1  | 0             | 0  | 1                             | 0     | 1     | 6                          | High         |
| <b>Cross-sectional studies</b>                                                             |           |    |    |    |               |    |                               |       |       | (Max. of 7)                |              |
| Ben-Ami et al, 2006                                                                        | 0         | 1  | 2  | 0  | 0             | 1  | 1                             | 0     | 0     | 5                          | High         |
| Hamprecht et al, 2016                                                                      | 1         | 1  | 1  | 0  | 1             | 1  | 1                             | 0     | 0     | 6                          | Low          |
| Huizinga et al, 2016                                                                       | 1         | 1  | 2  | 0  | 1             | 1  | 1                             | 0     | 0     | 7                          | Low          |
| Reuland et al, 2016                                                                        | 1         | 1  | 2  | 0  | 1             | 1  | 1                             | 0     | 0     | 7                          | Low          |
| Rodríguez-Baño et al, 2008                                                                 | 1         | 0  | 1  | 0  | 0             | 0  | 1                             | 0     | 0     | 3                          | High         |
| Tan et al, 2018                                                                            | 1         | 1  | 2  | 0  | 1             | 1  | 1                             | 0     | 0     | 7                          | Low          |
| Wielders et al, 2016                                                                       | 1         | 1  | 2  | 0  | 1             | 0  | 1                             | 0     | 0     | 6                          | Low          |
| Prasad et al, 2016                                                                         | 0         | 1  | 2  | 0  | 0             | 0  | 1                             | 0     | 0     | 4                          | High         |
| Latour et al, 2019                                                                         | 1         | 1  | 1  | 0  | 0             | 1  | 1                             | 0     | 0     | 5                          | High         |
| Goodman et al, 2019                                                                        | 0         | 1  | 2  | 0  | 1             | 1  | 1                             | 0     | 0     | 6                          | Low          |

<sup>a</sup> 0 not applicable; 1 one star allocated; 2 two stars allocated; 0 no star allocated.

<sup>b</sup> Case-control studies are scored on the exposure of interest, whereas cohort and cross-sectional studies are scored on the outcome of interest.

|                                                                                                                                                                                                     |  |
|-----------------------------------------------------------------------------------------------------------------------------------------------------------------------------------------------------|--|
| ° Cohort and case-control studies with an overall score of $\geq 7$ were judged to be of high quality. Cross-sectional studies with an overall score of $\geq 6$ were judged to be of high quality. |  |
|-----------------------------------------------------------------------------------------------------------------------------------------------------------------------------------------------------|--|

| <b>eTable 6. Sensitivity Analyses After Exclusion of Studies on Urinary Tract Infections<sup>a</sup></b> |                       |                           |                            |                      |
|----------------------------------------------------------------------------------------------------------|-----------------------|---------------------------|----------------------------|----------------------|
| <b>Meta-analysis<sup>b</sup></b>                                                                         | <b>No. of studies</b> | <b>Outcome</b>            | <b>Summary OR (95% CI)</b> | <b>I<sup>2</sup></b> |
| <b>Primary analysis</b>                                                                                  |                       |                           |                            |                      |
| Sensitivity analysis before exclusion                                                                    | 12                    | Intestinal carriage + UTI | 1.74 (1.40 – 2.16)         | 68%                  |
| Sensitivity analysis after exclusion                                                                     | 11                    | Intestinal carriage       | 1.86 (1.46 - 2.37)         | 70%                  |
| <b>Subgroup, MDRO subtype</b>                                                                            |                       |                           |                            |                      |
| <b>MDR-E</b>                                                                                             |                       |                           |                            |                      |
| Sensitivity analysis before exclusion                                                                    | 19                    | Intestinal carriage + UTI | 1.60 (1.33 - 1.92)         | 54%                  |
| Sensitivity analysis after exclusion                                                                     | 17                    | Intestinal carriage       | 1.67 (1.35 - 2.07)         | 58%                  |
| <b>ESBL-E</b>                                                                                            |                       |                           |                            |                      |
| Sensitivity analysis before exclusion                                                                    | 19                    | Intestinal carriage + UTI | 1.43 (1.20 - 1.70)         | 36%                  |
| Sensitivity analysis after exclusion                                                                     | 17                    | Intestinal carriage       | 1.51 (1.22 - 1.87)         | 44%                  |
| <b>CPE</b>                                                                                               |                       |                           |                            |                      |
| Sensitivity analysis before exclusion                                                                    | 5                     | Intestinal carriage       | 2.04 (1.34 - 3.10)         | 53%                  |
| Sensitivity analysis after exclusion                                                                     | N/A                   | N/A                       | N/A                        | N/A                  |
| <b>VRE</b>                                                                                               |                       |                           |                            |                      |
| Sensitivity analysis before exclusion                                                                    | 7                     | Intestinal carriage       | 1.97 (1.49 - 2.60)         | 31%                  |
| Sensitivity analysis after exclusion                                                                     | N/A                   | N/A                       | N/A                        | N/A                  |
| <b>Subgroup, acid suppressant</b>                                                                        |                       |                           |                            |                      |
| <b>PPI</b>                                                                                               |                       |                           |                            |                      |
| Sensitivity analysis before exclusion                                                                    | 17                    | Intestinal carriage + UTI | 1.81 (1.52 - 2.16)         | 33%                  |
| Sensitivity analysis after exclusion                                                                     | 15                    | Intestinal carriage       | 1.93 (1.66 - 2.25)         | 7%                   |
| <b>H2RA</b>                                                                                              |                       |                           |                            |                      |
| Sensitivity analysis before exclusion                                                                    | 4                     | Intestinal carriage       | 1.33 (0.86 - 2.08)         | 15%                  |
| Sensitivity analysis after exclusion                                                                     | N/A                   | N/A                       | N/A                        | N/A                  |
| <b>Subgroup, design</b>                                                                                  |                       |                           |                            |                      |
| <b>Cohort</b>                                                                                            |                       |                           |                            |                      |
| Sensitivity analysis before exclusion                                                                    | 5                     | Intestinal carriage       | 2.31 (1.56 - 3.43)         | 0%                   |
| Sensitivity analysis after exclusion                                                                     | N/A                   | N/A                       | N/A                        | N/A                  |
| <b>Case-control</b>                                                                                      |                       |                           |                            |                      |
| Sensitivity analysis before exclusion                                                                    | 7                     | Intestinal carriage + UTI | 1.64 (1.13 - 2.38)         | 66%                  |
| Sensitivity analysis after exclusion                                                                     | 5                     | Intestinal carriage       | 1.93 (1.17 - 3.18)         | 66%                  |
| <b>Cross-sectional</b>                                                                                   |                       |                           |                            |                      |
| Sensitivity analysis before exclusion                                                                    | 13                    | Intestinal carriage       | 1.84 (1.47 - 2.30)         | 58%                  |
| Sensitivity analysis after exclusion                                                                     | N/A                   | N/A                       | N/A                        | N/A                  |
| <b>Subgroup, setting</b>                                                                                 |                       |                           |                            |                      |
| <b>Travel</b>                                                                                            |                       |                           |                            |                      |
| Sensitivity analysis before exclusion                                                                    | 4                     | Intestinal carriage       | 1.11 (0.82 - 1.50)         | 0%                   |
| Sensitivity analysis after exclusion                                                                     | N/A                   | N/A                       | N/A                        | N/A                  |
| <b>Community</b>                                                                                         |                       |                           |                            |                      |
| Sensitivity analysis before exclusion                                                                    | 4                     | Intestinal carriage + UTI | 1.41 (1.07 - 1.87)         | 21%                  |
| Sensitivity analysis after exclusion                                                                     | 3                     | Intestinal carriage       | 1.69 (1.17 - 2.42)         | 0%                   |
| <b>At hospital admission</b>                                                                             |                       |                           |                            |                      |
| Sensitivity analysis before exclusion                                                                    | 4                     | Intestinal carriage       | 2.39 (1.17 - 4.87)         | 82%                  |
| Sensitivity analysis after exclusion                                                                     | N/A                   | N/A                       | N/A                        | N/A                  |
| <b>In-hospital</b>                                                                                       |                       |                           |                            |                      |
| Sensitivity analysis before exclusion                                                                    | 11                    | Intestinal carriage + UTI | 1.98 (1.50 - 2.62)         | 33%                  |
| Sensitivity analysis after exclusion                                                                     | 10                    | Intestinal carriage       | 2.04 (1.53 - 2.72)         | 35%                  |

| <b>eTable 6. Sensitivity Analyses After Exclusion of Studies on Urinary Tract Infections<sup>a</sup></b>                                                                                                                                                                                                                                                                                                                                                                                  |                       |                           |                            |                      |
|-------------------------------------------------------------------------------------------------------------------------------------------------------------------------------------------------------------------------------------------------------------------------------------------------------------------------------------------------------------------------------------------------------------------------------------------------------------------------------------------|-----------------------|---------------------------|----------------------------|----------------------|
| <b>(continued)</b>                                                                                                                                                                                                                                                                                                                                                                                                                                                                        |                       |                           |                            |                      |
| <b>Meta-analysis</b>                                                                                                                                                                                                                                                                                                                                                                                                                                                                      | <b>No. of studies</b> | <b>Outcome</b>            | <b>Summary OR (95% CI)</b> | <b>I<sup>2</sup></b> |
| <b>Sensitivity analysis</b>                                                                                                                                                                                                                                                                                                                                                                                                                                                               |                       |                           |                            |                      |
| <b>High quality</b>                                                                                                                                                                                                                                                                                                                                                                                                                                                                       |                       |                           |                            |                      |
| Sensitivity analysis before exclusion                                                                                                                                                                                                                                                                                                                                                                                                                                                     | 15                    | Intestinal carriage + UTI | 1.64 (1.37 - 1.97)         | 60%                  |
| Sensitivity analysis after exclusion                                                                                                                                                                                                                                                                                                                                                                                                                                                      | 13                    | Intestinal carriage       | 1.74 (1.42 - 2.14)         | 64%                  |
| <b>High quality with max. NOS score for exposure ascertainment</b>                                                                                                                                                                                                                                                                                                                                                                                                                        |                       |                           |                            |                      |
| Sensitivity analysis before exclusion                                                                                                                                                                                                                                                                                                                                                                                                                                                     | 13                    | Intestinal carriage + UTI | 1.81 (1.47 - 2.21)         | 45%                  |
| Sensitivity analysis after exclusion                                                                                                                                                                                                                                                                                                                                                                                                                                                      | 11                    | Intestinal carriage       | 1.94 (1.60 - 2.36)         | 28%                  |
| <b>High quality with max. NOS score for exposure ascertainment and age, sex, and antibiotic use adjustment</b>                                                                                                                                                                                                                                                                                                                                                                            |                       |                           |                            |                      |
| Sensitivity analysis before exclusion                                                                                                                                                                                                                                                                                                                                                                                                                                                     | 5                     | Intestinal carriage + UTI | 1.88 (1.33 - 2.64)         | 69%                  |
| Sensitivity analysis after exclusion                                                                                                                                                                                                                                                                                                                                                                                                                                                      | 4                     | Intestinal carriage       | 2.15 (1.52 - 3.04)         | 49%                  |
| Abbreviations: CI, confidence interval; CPE, carbapenemase-producing <i>Enterobacteriales</i> ; ESBL-E, extended-spectrum $\beta$ -lactamase-producing <i>Enterobacteriales</i> ; H2RA, histamine <sub>2</sub> receptor antagonist; MDR-E, multidrug-resistant <i>Enterobacteriales</i> (ESBL-E and CPE); MDRO, multidrug-resistant micro-organism; N/A, not applicable; OR, odds ratio; PPI, proton pump inhibitor; UTI, urinary tract infection; VRE, vancomycin-resistant enterococci. |                       |                           |                            |                      |
| <sup>a</sup> Sensitivity analyses were performed after exclusion of the studies by Sogaard et al. and Lee et al.                                                                                                                                                                                                                                                                                                                                                                          |                       |                           |                            |                      |
| <sup>b</sup> Subgroup analyses were performed on all 26 studies.                                                                                                                                                                                                                                                                                                                                                                                                                          |                       |                           |                            |                      |



| <b>eTable 7. Sensitivity Analysis by the Leaving-One-Out Method<sup>a</sup></b> |                                                              |
|---------------------------------------------------------------------------------|--------------------------------------------------------------|
| <b>Excluded study</b>                                                           | <b>Results After Study Exclusion<br/>Summary OR (95% CI)</b> |
| Arcilla et al, 2016                                                             | 1.75 (1.48 – 2.07)                                           |
| Ben-Ami et al, 2006                                                             | 1.68 (1.43 – 1.97)                                           |
| Chanderraj et al, 2019                                                          | 1.70 (1.43 – 2.01)                                           |
| Cheng et al, 2016                                                               | 1.64 (1.40 – 1.92)                                           |
| Falk et al, 2000                                                                | 1.66 (1.43 – 1.93)                                           |
| Ford et al, 2015                                                                | 1.69 (1.44 – 1.99)                                           |
| Goodman et al, 2019                                                             | 1.64 (1.40 – 1.92)                                           |
| Hagel et al, 2019                                                               | 1.69 (1.43 – 1.99)                                           |
| Hamprecht et al, 2016                                                           | 1.75 (1.49 – 2.07)                                           |
| Huizinga et al, 2016                                                            | 1.66 (1.41 – 1.94)                                           |
| Kuenzli et al, 2014                                                             | 1.71 (1.45 – 2.01)                                           |
| Latour et al, 2019                                                              | 1.70 (1.43 – 2.01)                                           |
| Lee et al, 2018                                                                 | 1.71 (1.45 – 2.01)                                           |
| McNeil et al, 2005                                                              | 1.67 (1.42 – 1.96)                                           |
| Okamoto et al, 2017                                                             | 1.73 (1.47 – 2.04)                                           |
| Prasad et al, 2016                                                              | 1.68 (1.42 – 1.98)                                           |
| Puzniak et al, 2001                                                             | 1.67 (1.43 – 1.97)                                           |
| Reuland et al, 2016                                                             | 1.69 (1.43 – 1.99)                                           |
| Rodríguez-Baño et al, 2008                                                      | 1.72 (1.46 – 2.02)                                           |
| Seekatz et al, 2018                                                             | 1.71 (1.45 – 2.01)                                           |
| Slaughter et al, 1996                                                           | 1.69 (1.44 – 1.99)                                           |
| Søgaard et al, 2017                                                             | 1.75 (1.47 – 2.08)                                           |
| Tan et al, 2018                                                                 | 1.71 (1.44 – 2.03)                                           |
| Vading et al, 2016                                                              | 1.72 (1.47 – 2.02)                                           |
| Wielders et al, 2016                                                            | 1.69 (1.43 – 2.00)                                           |
| Östholm-Balkhed et al, 2013                                                     | 1.71 (1.45 – 2.01)                                           |
| Abbreviations: CI, confidence interval; OR, odds ratio.                         |                                                              |
| <sup>a</sup> Overall summary estimate: OR, 1.71; 95% CI, 1.45 – 2.01.           |                                                              |

| <b>eTable 8. Sensitivity Analysis by Knapp-Hartung Modification<sup>a</sup></b> |                       |                    |           |          |                 |            |            |                      |  |
|---------------------------------------------------------------------------------|-----------------------|--------------------|-----------|----------|-----------------|------------|------------|----------------------|--|
| <b>Included Studies</b>                                                         | <b>No. of studies</b> | <b>Coefficient</b> | <b>SE</b> | <b>t</b> | <b>P&gt; t </b> | <b>LCL</b> | <b>UCL</b> | <b>I<sup>2</sup></b> |  |
| With studies investigating the proxy outcome                                    | 26                    | 0.52               | 0.09      | 6.07     | <.001           | 0.34       | 0.69       | 53%                  |  |
| Without studies investigating the proxy outcome <sup>b</sup>                    | 24                    | 0.55               | 0.09      | 6.17     | <.001           | 0.37       | 0.74       | 55%                  |  |

Abbreviations: SE, standard error of the coefficient; LCL, lower confidence limit of the coefficient; UCL, upper confidence limit of the coefficient.

<sup>a</sup> Calculated with STATA software; all values were rounded to the second decimal point.

<sup>b</sup> Sensitivity analysis was performed after exclusion of the studies by Sogaard et al. and Lee et al.

## eFigure 1. Secondary analysis

Abbreviations: AST, acid suppressive therapy; IV, inverse variance (red).

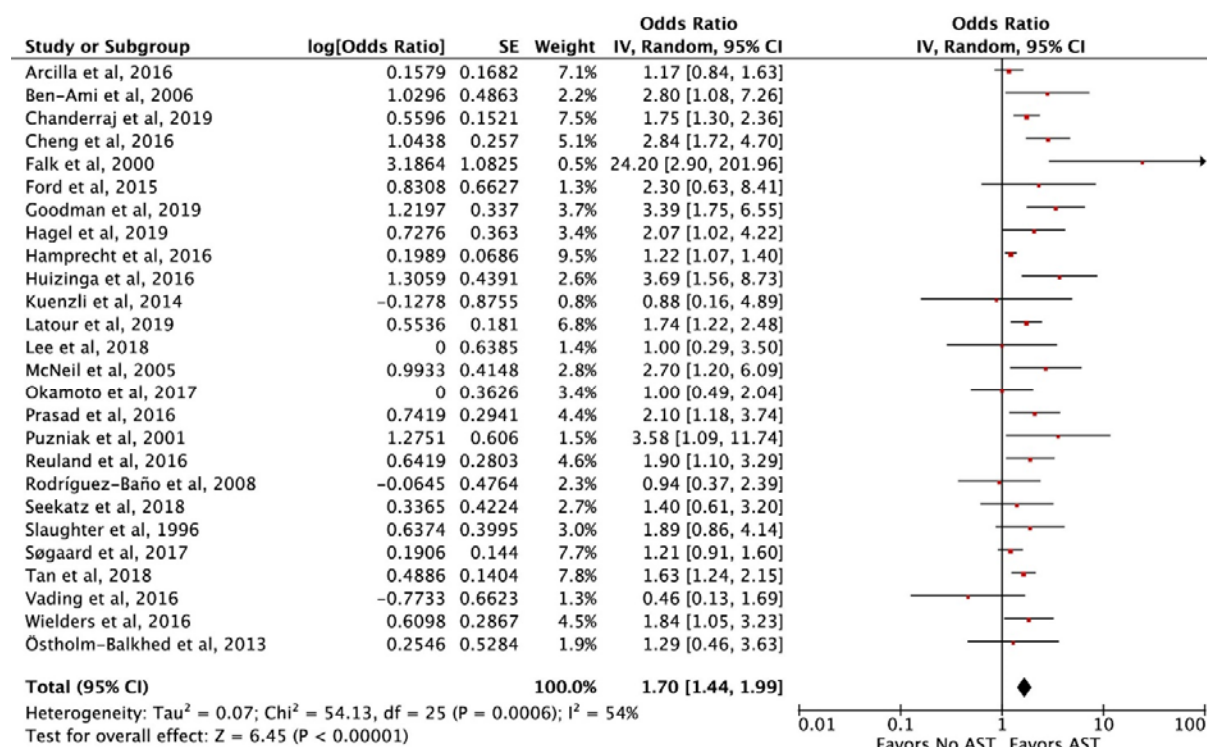

## eFigure 2. Subgroup Analysis by Design

Abbreviations: AST, acid suppressive therapy; IV, inverse variance (red).

### eFigure 2A. Cohort

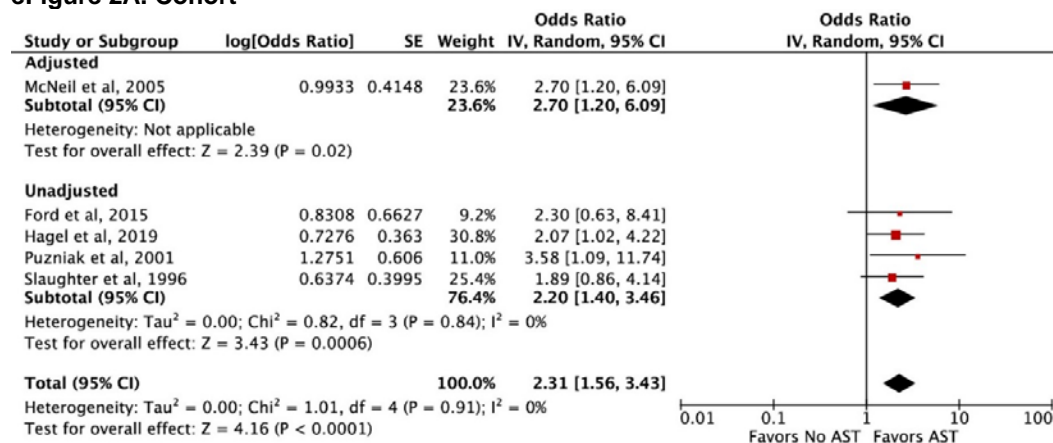

### eFigure 2B. Case-control

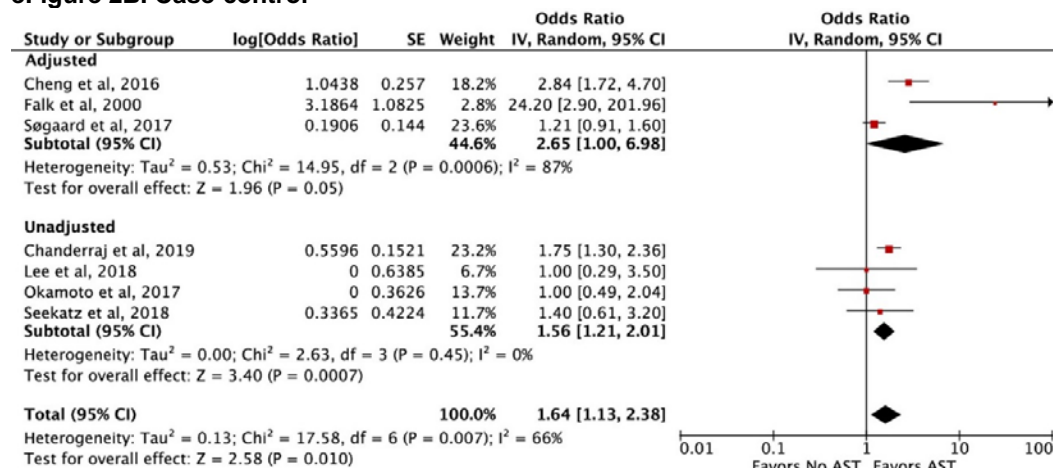

### eFigure 2C. Cross-sectional

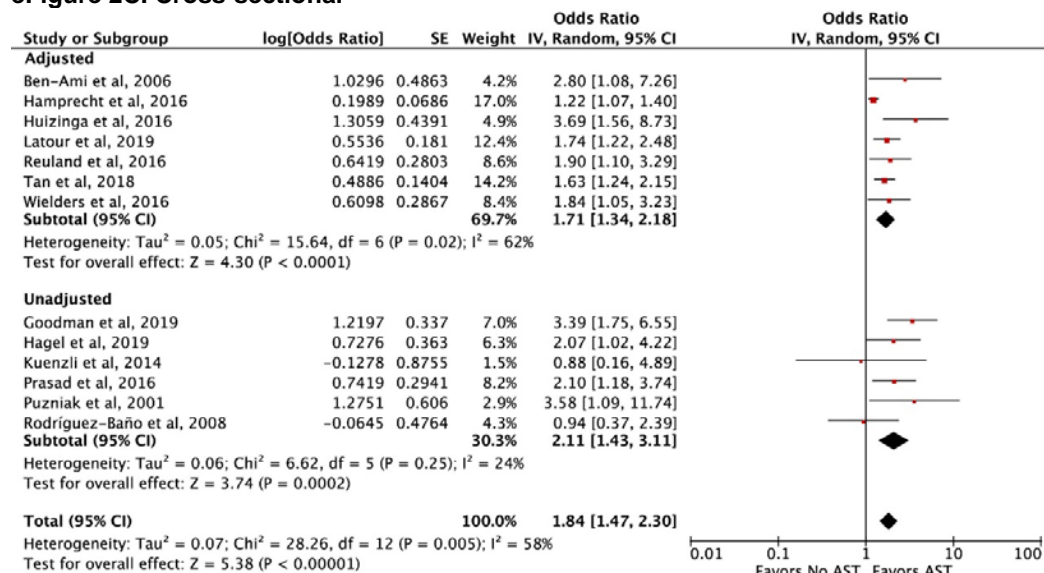

### eFigure 3. Subgroup Analysis by Type of Acid Suppressant

Abbreviations: AST, acid suppressive therapy; IV, inverse variance (red).

#### eFigure 3A. Proton pump inhibitor

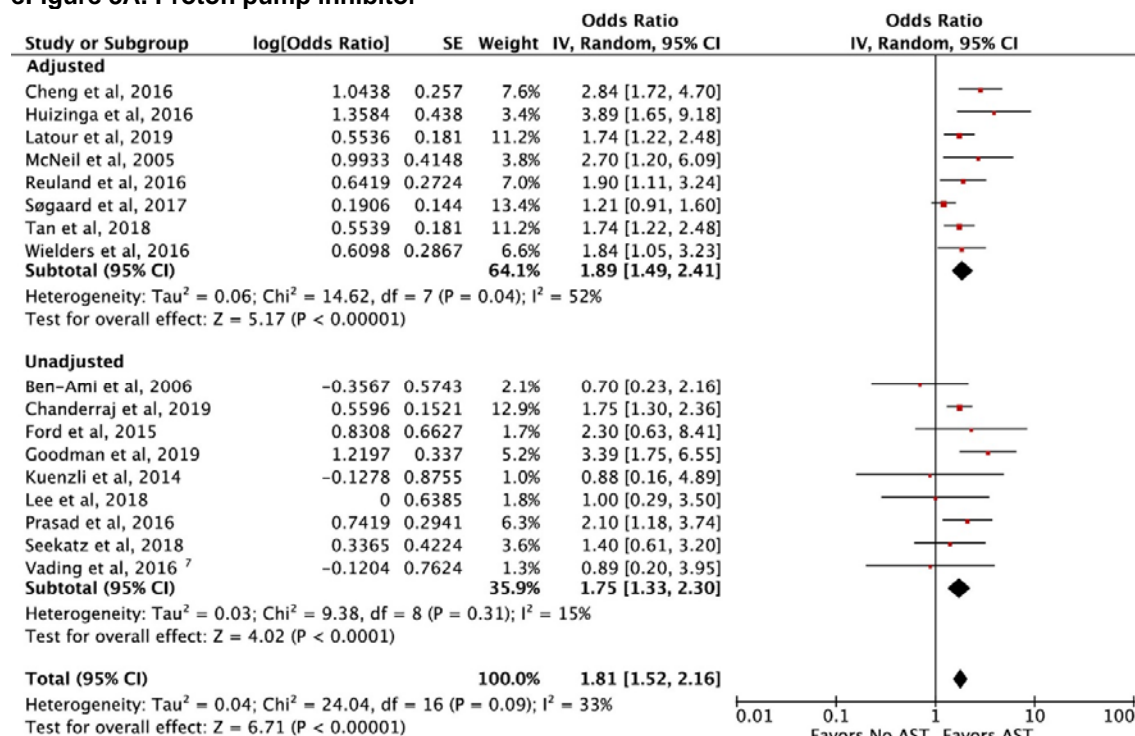

#### eFigure 3B. Histamine<sub>2</sub> receptor antagonist

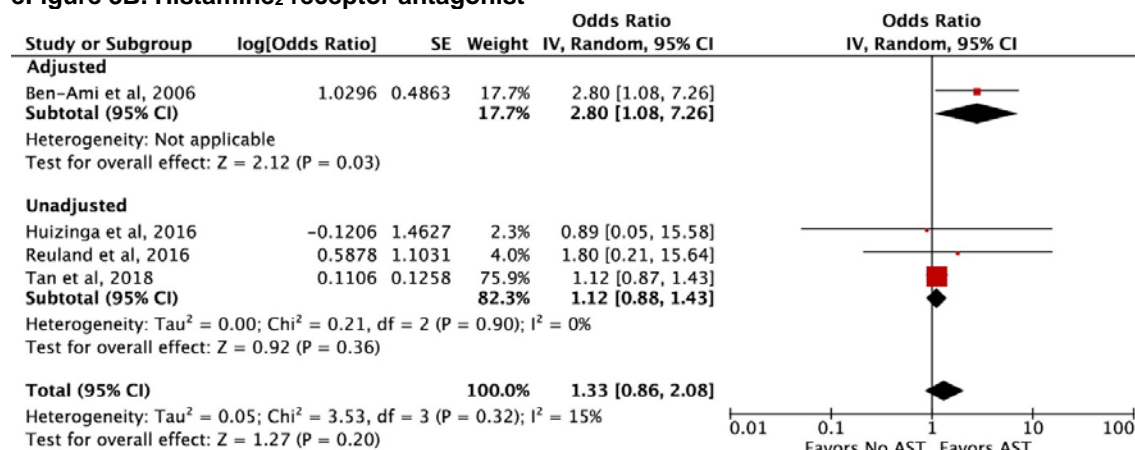

## eFigure 4. Subgroup Analysis by Setting

Abbreviations: AST, acid suppressive therapy; IV, inverse variance (red).

### eFigure 4A. Travel

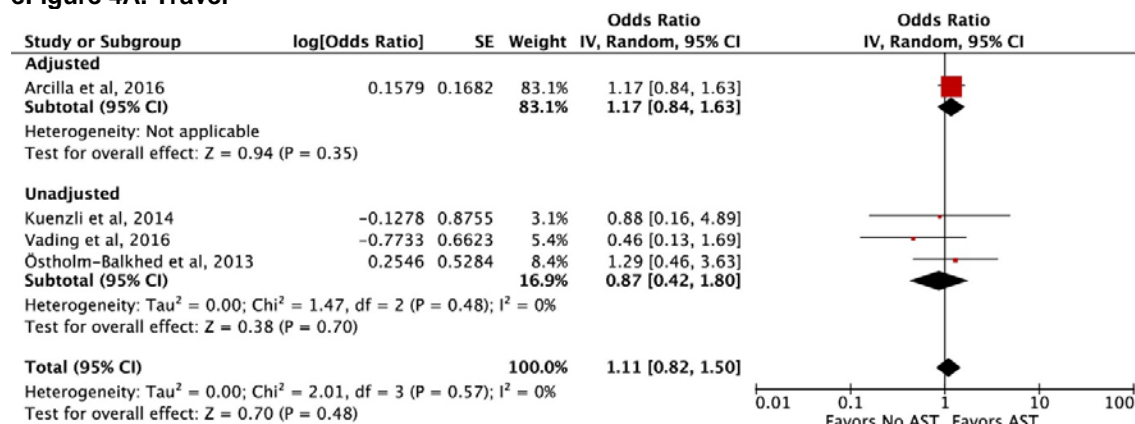

### eFigure 4B. Community

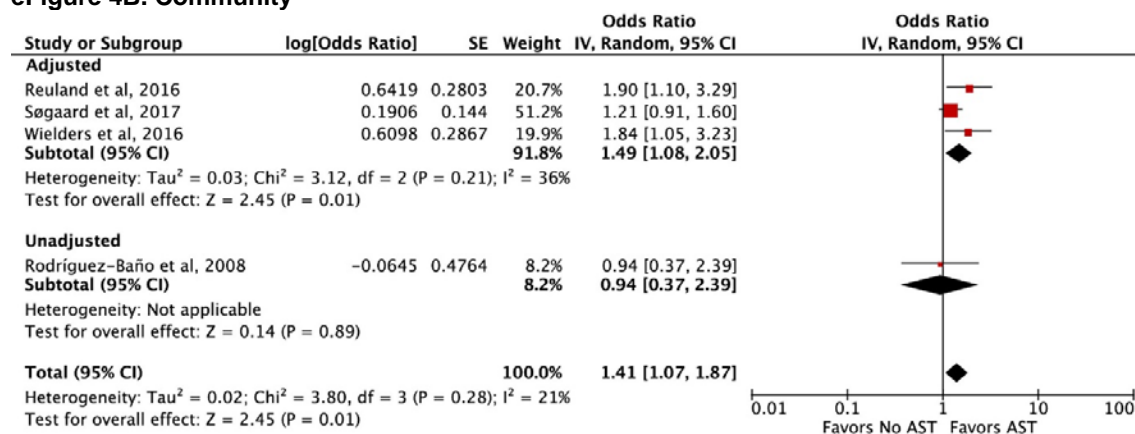

### eFigure 4C. At hospital admission

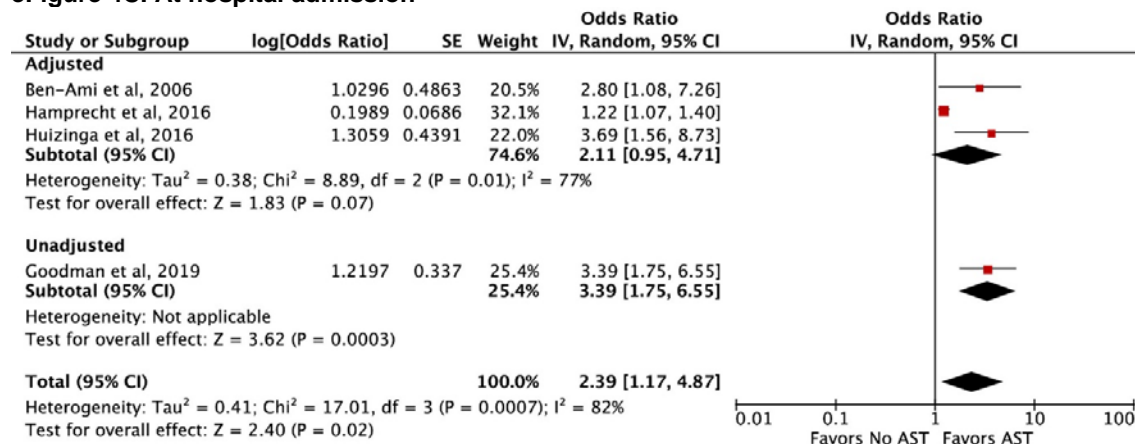

**eFigure 4D. In-hospital**

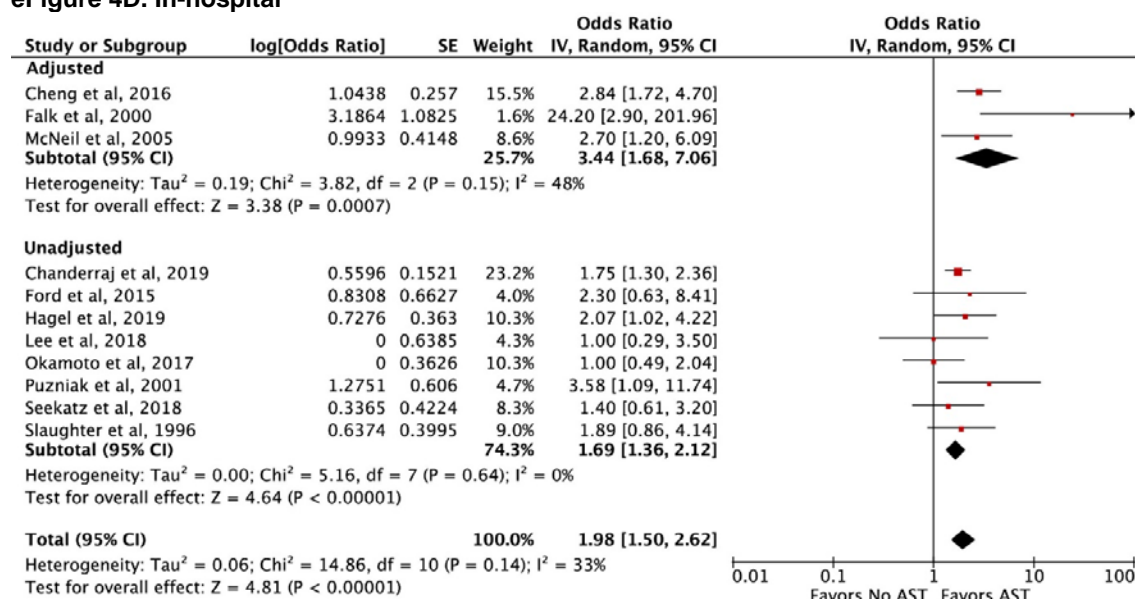

## eFigure 5. Sensitivity Analysis of Studies With High Quality

Abbreviations: AST, acid suppressive therapy; IV, inverse variance (red).

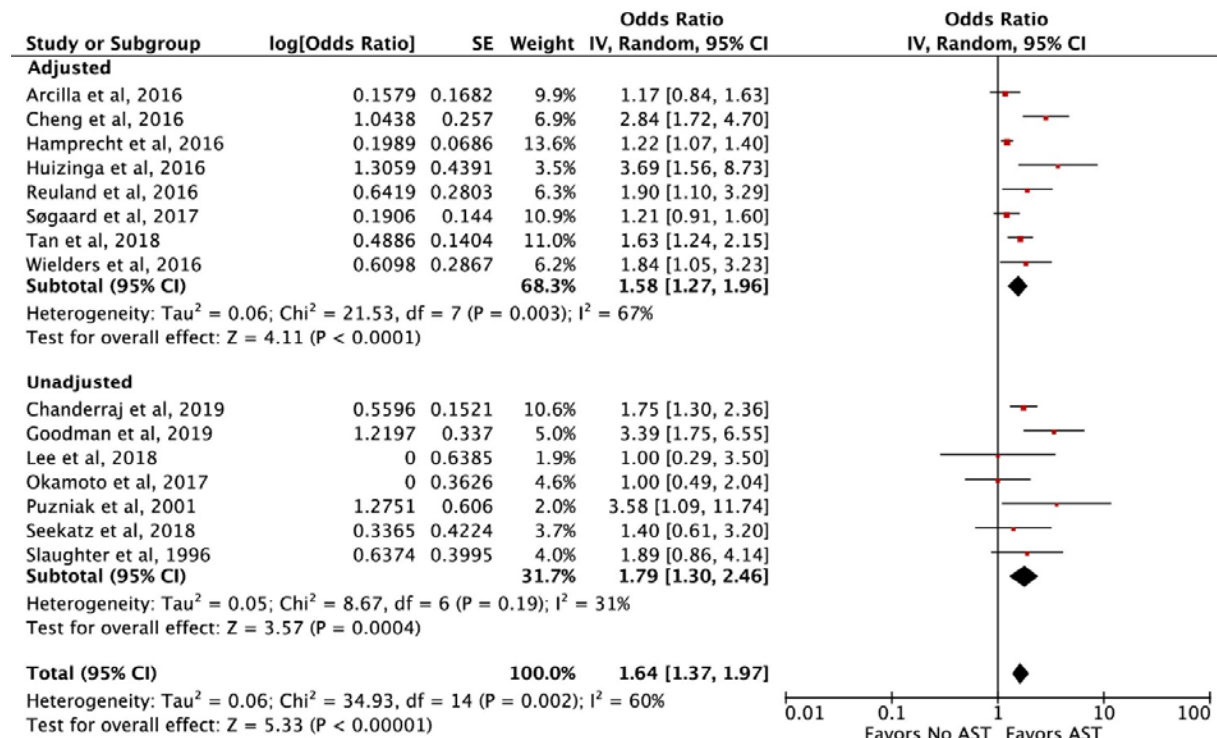



## eFigure 6. Sensitivity Analysis by Mantel-Haenszel Weighting

### eFigure 6A. Subgroup analysis by MDRO subtype

Abbreviations: AST, acid suppressive therapy; CPE, carbapenemase-producing Enterobacteriales; ESBL-E, extended-spectrum  $\beta$ -lactamase-producing Enterobacteriales; MDR-E, multidrug-resistant Enterobacteriales; M-H, Mantel-Haenszel (blue); VRE, vancomycin-resistant enterococci.

Subgroup analysis by type of MDRO using the Mantel-Haenszel method with the random effects model.

#### MDR-E

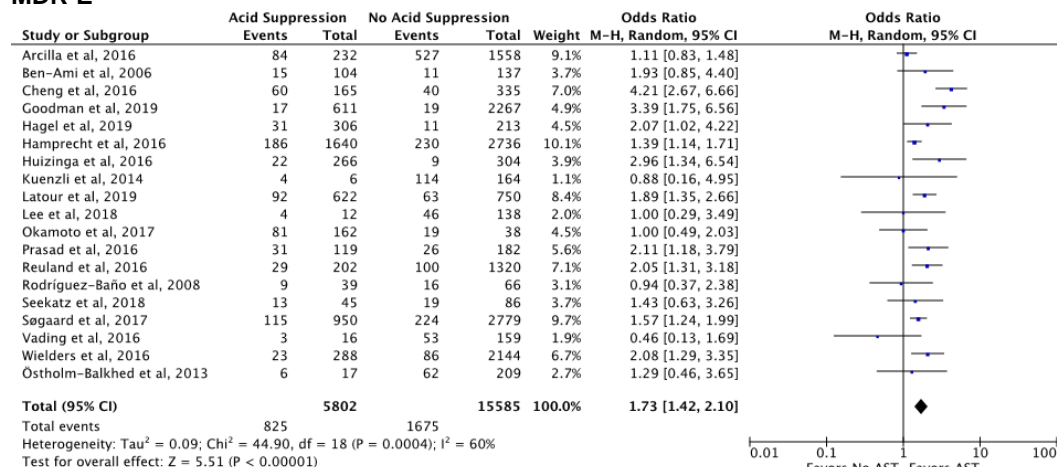

#### VRE

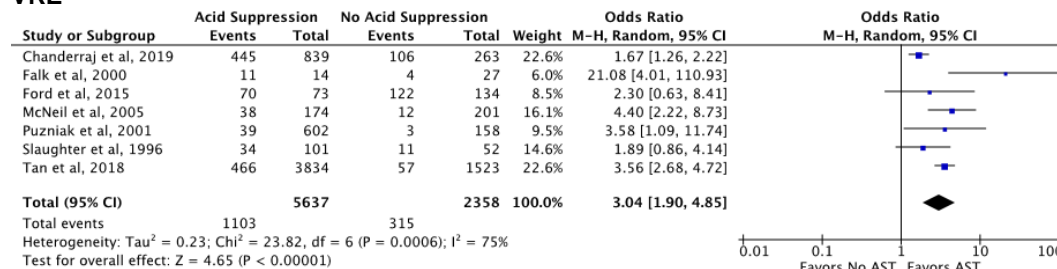

#### CPE

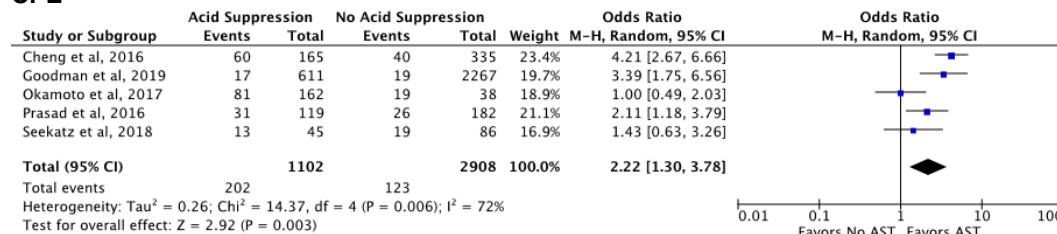

#### ESBL-E

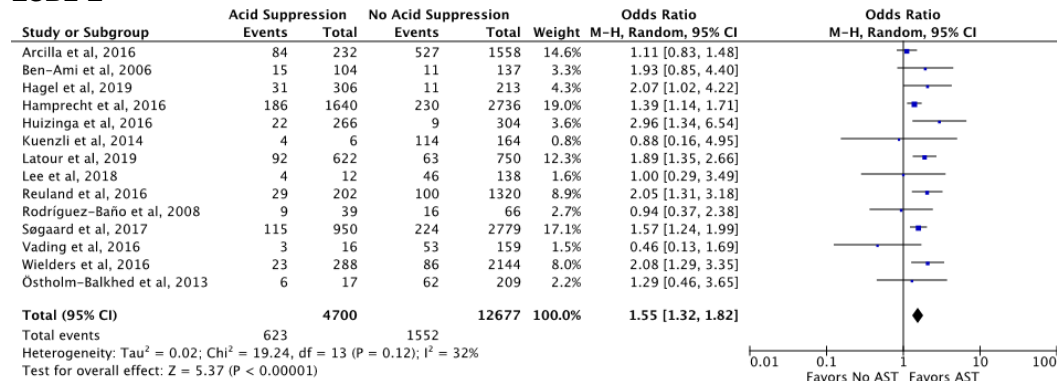

## eFigure 6B. Subgroup analysis by design

Abbreviations: AST, acid suppressive therapy; M-H, Mantel-Haenszel (blue).

Subgroup analysis by study design using the Mantel-Haenszel method with the random effects model.

### Cohort

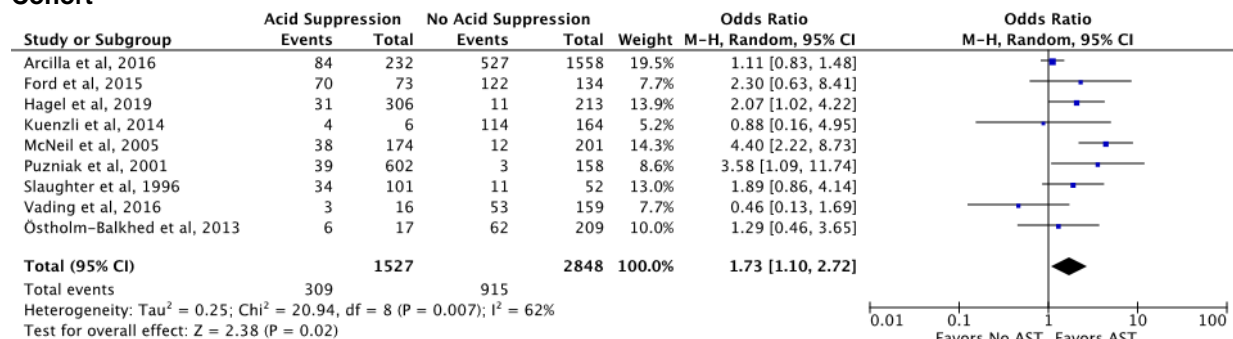

### Case-control

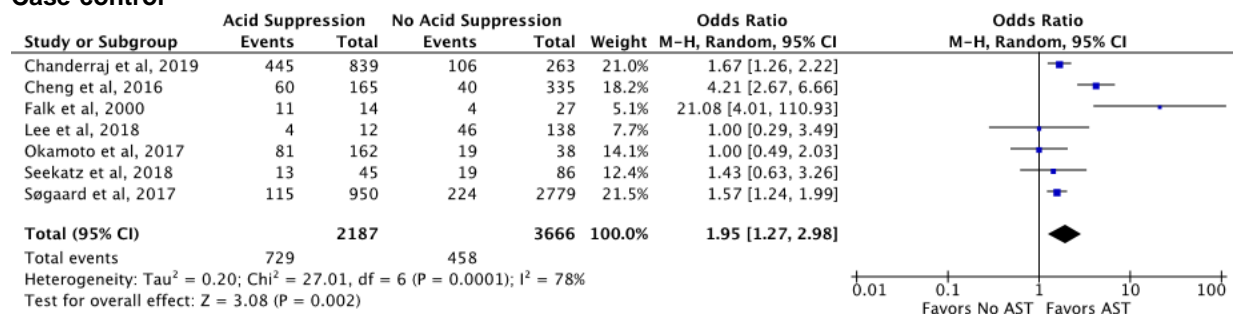

### Cross-sectional

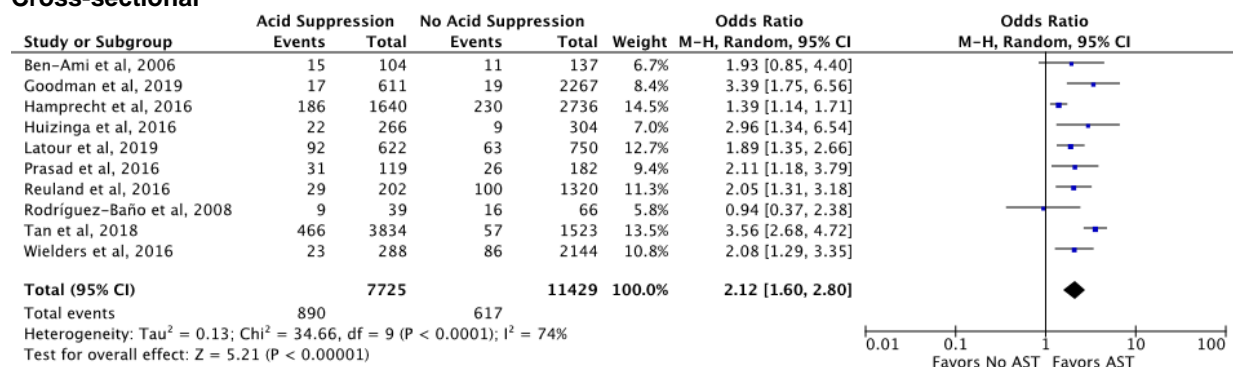

### eFigure 6C. Subgroup analysis by acid suppressant

Abbreviations: AST, acid suppressive therapy; M-H, Mantel-Haenszel (blue). Subgroup analysis by type of acid suppressant using the Mantel-Haenszel method with the random effects model.

#### Proton pump inhibitor

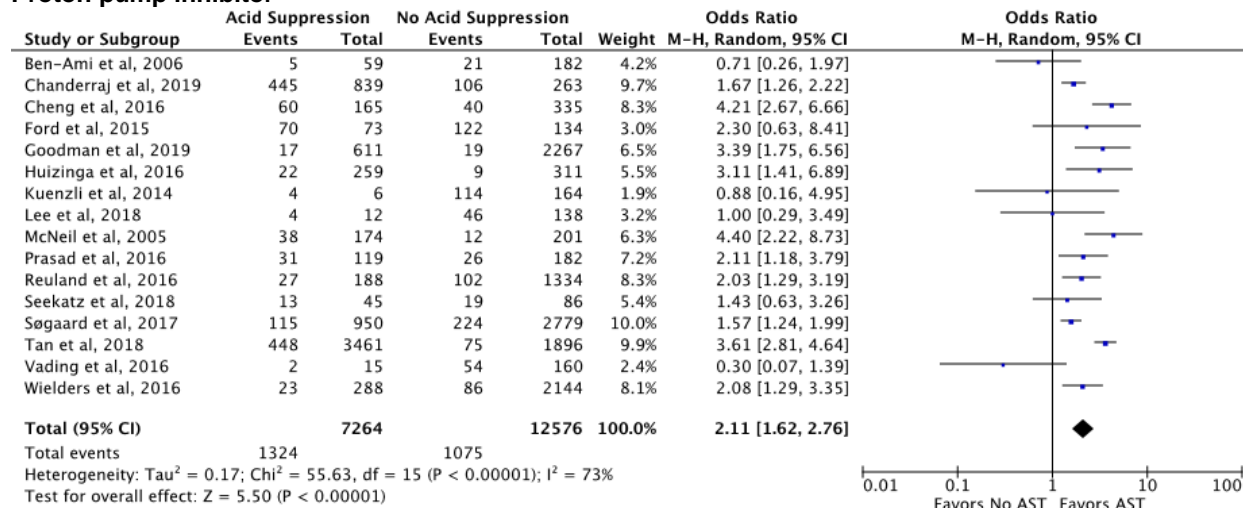

#### Histamine<sub>2</sub> receptor antagonist

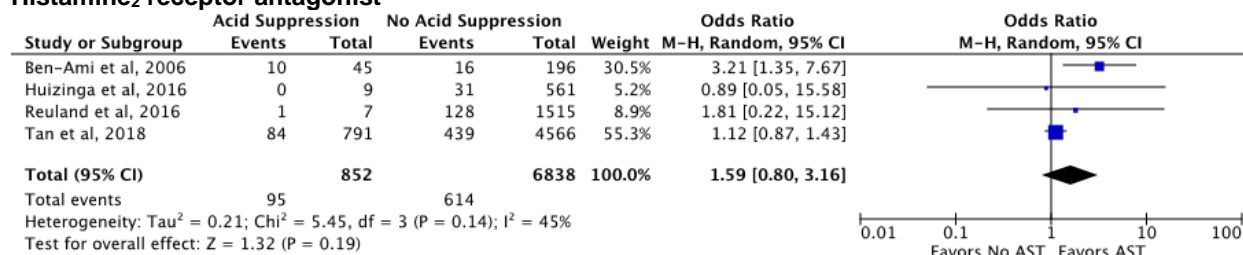

## eFigure 6D. Subgroup analysis by setting

Abbreviations: AST, acid suppressive therapy; M-H, Mantel-Haenszel (blue).

Subgroup analysis by study setting using the Mantel-Haenszel method with the random effects model.

### Travel

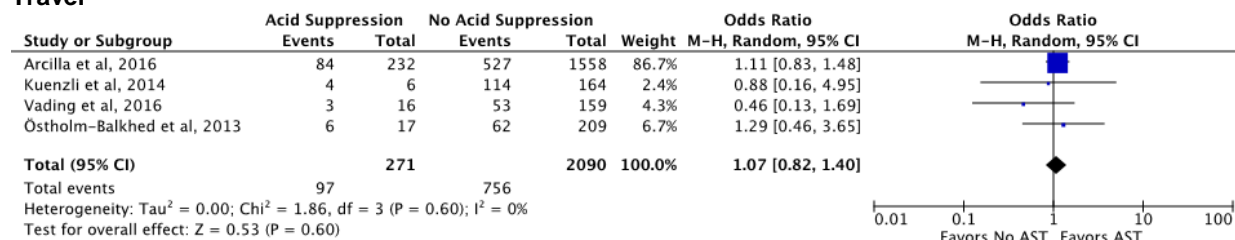

### Community

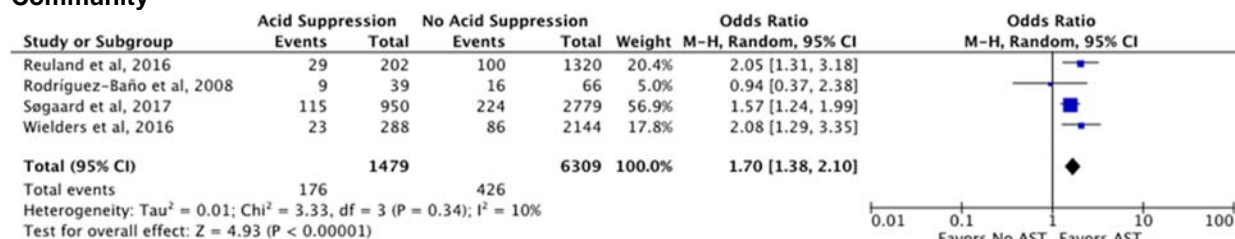

### At hospital admission

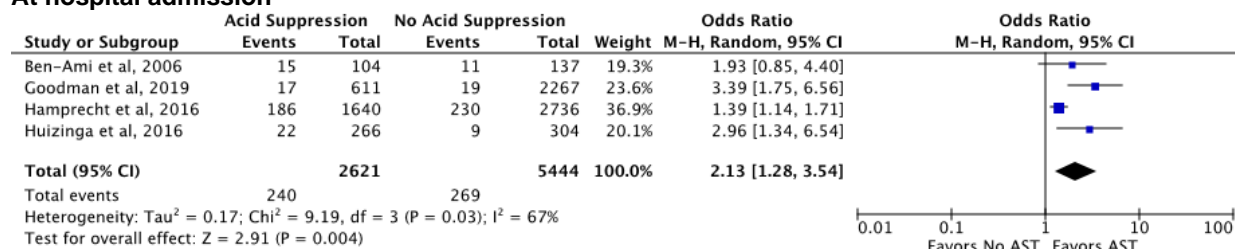

### In-hospital

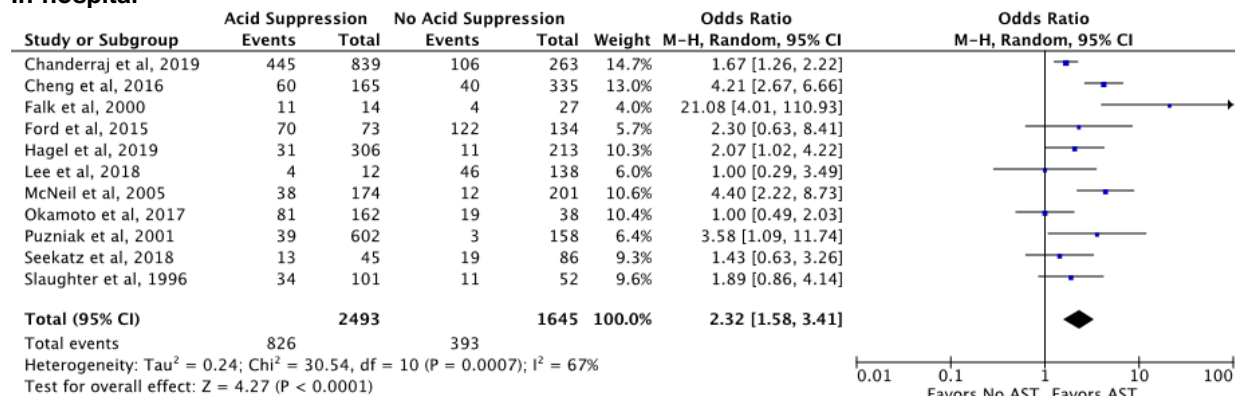

### eFigure 6E. Secondary Analysis

Abbreviations: AST, acid suppressive therapy; M-H, Mantel-Haenszel (blue).

Secondary analysis of all studies using the Mantel-Haenszel method with the random effects model.

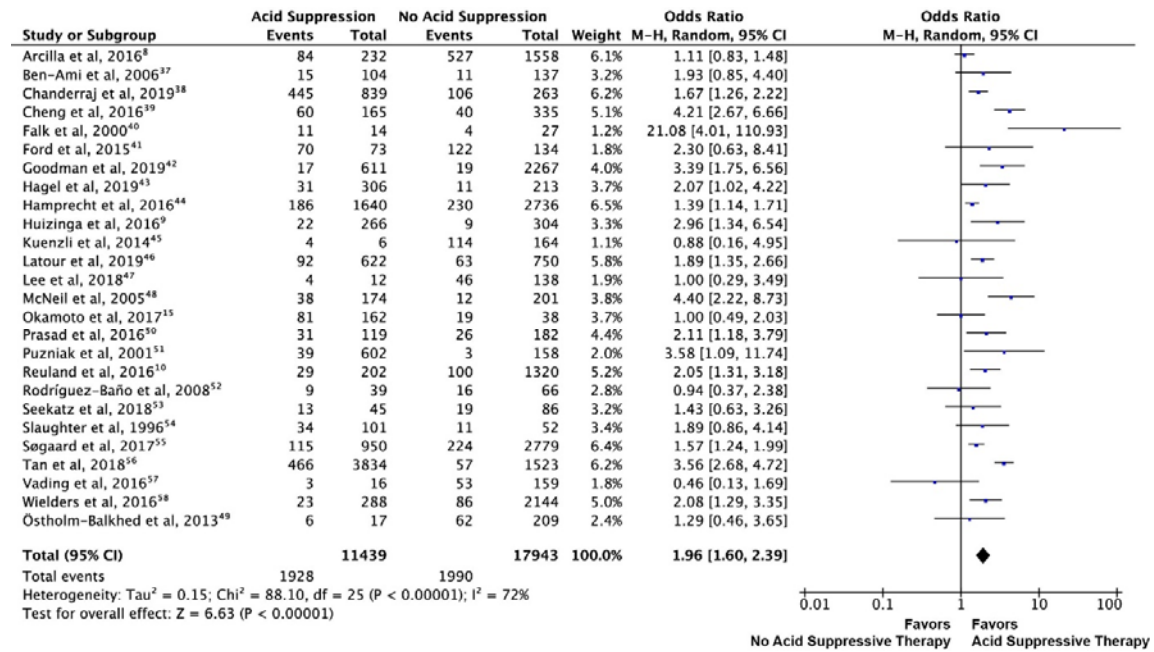

### eFigure 6F. Analysis of studies with high quality

Abbreviations: AST, acid suppressive therapy; M-H, Mantel-Haenszel (blue).

Analysis of the high-quality studies using the Mantel-Haenszel method with the random effects model.

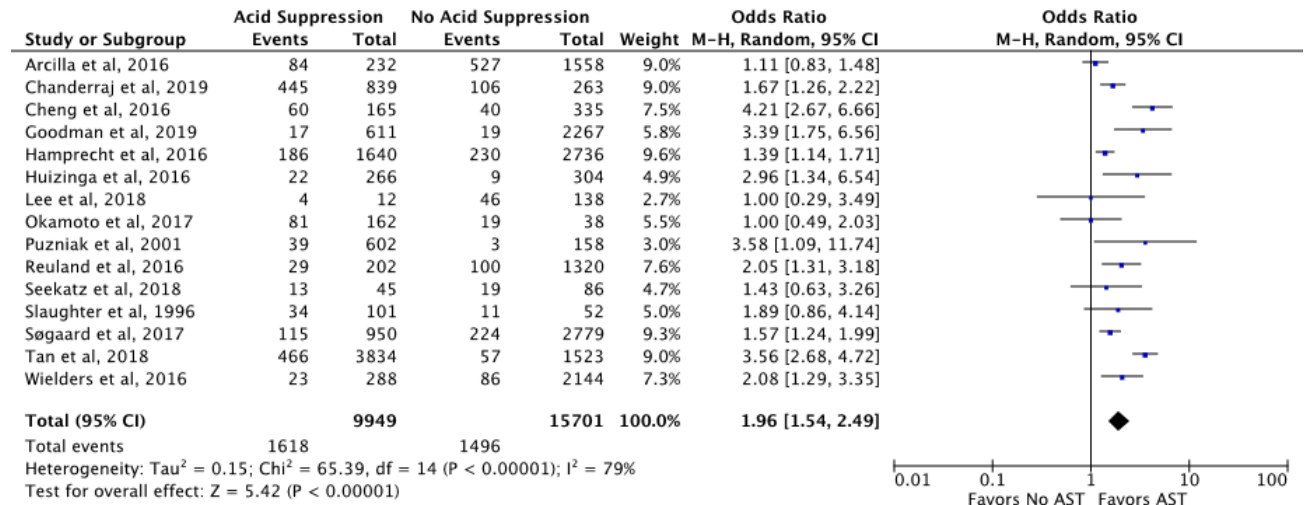

**eFigure 7. Funnel Plot**

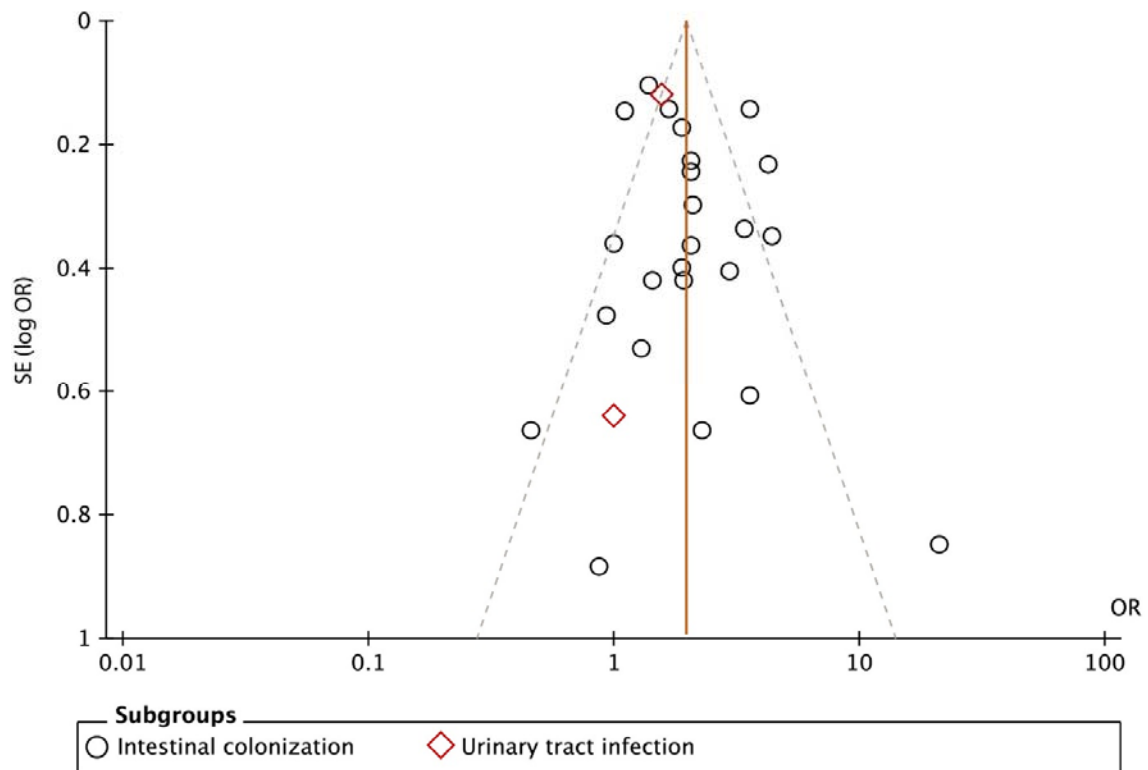

Abbreviations: OR, odds ratio; SE, standard error.

Center orange line represents the summary effect estimate. Outer dotted lines display 95% CIs. Egger's test and Peter's test indicated no publication bias (Egger:  $P = .39$ ; Peter:  $P = .80$ ); publication bias estimators remained unchanged after exclusion of the two studies on the surrogate outcome (Egger:  $P = .40$ ; Peter:  $P = .86$ ). Raw data were used to examine publication bias.

## eReferences

1. Wells GA, Shea B, O'Connell D, et al. The Newcastle-Ottawa Scale (NOS) for assessing the quality of nonrandomized studies in meta-analyses. Ottawa Hospital Research Institute. [http://www.ohri.ca/programs/clinical\\_epidemiology/oxford.asp](http://www.ohri.ca/programs/clinical_epidemiology/oxford.asp). Accessed December 12, 2017.
2. World Health Organization. Definition of region groupings. 2013. <https://www.who.int/about/who-we-are/regional-offices>. Accessed September 5, 2018.
3. Arcilla MS, van Hattem JM, Haverkate MR, et al. Import and spread of extended-spectrum beta-lactamase-producing Enterobacteriaceae by international travellers (COMBAT study): a prospective, multicentre cohort study. *Lancet Infect Dis*. 2017;17(1):78-85.
4. Ben-Ami R, Schwaber MJ, Navon-Venezia S, et al. Influx of extended-spectrum beta-lactamase-producing enterobacteriaceae into the hospital. *Clin Infect Dis*. 2006;42(7):925-934.
5. Chanderraj R, Millar JA, Patel TS, et al. Vancomycin-resistant Enterococcus acquisition in a tertiary care hospital: testing the roles of antibiotic use, proton pump inhibitor use, and colonization pressure. *Open Forum Infect Dis*. 2019;6(4):ofz139.
6. Cheng VC, Chen JH, So SY, et al. A novel risk factor associated with colonization by carbapenemase-producing Enterobacteriaceae: use of proton pump inhibitors in addition to antimicrobial treatment. *Infect Control Hosp Epidemiol*. 2016;37(12):1418-1425.
7. Falk PS, Winnike J, Woodmansee C, Desai M, Mayhall CG. Outbreak of vancomycin-resistant enterococci in a burn unit. *Infect Control Hosp Epidemiol*. 2000;21(9):575-582.
8. Ford CD, Lopansri BK, Haydoura S, et al. Frequency, risk factors, and outcomes of vancomycin-resistant Enterococcus colonization and infection in patients with newly diagnosed acute leukemia: different patterns in patients with acute myelogenous and acute lymphoblastic leukemia. *Infect Control Hosp Epidemiol*. 2015;36(1):47-53.
9. Goodman KE, Simner PJ, Klein EY, et al. Predicting probability of perirectal colonization with carbapenem-resistant Enterobacteriaceae (CRE) and other carbapenem-resistant organisms (CROs) at hospital unit admission. *Infect Control Hosp Epidemiol*. 2019;40(5):541-550.
10. Hagel S, Makarewicz O, Hartung A, et al. ESBL colonization and acquisition in a hospital population: the molecular epidemiology and transmission of resistance genes. *PLoS One*. 2019;14(1):e0208505.
11. Hamprecht A, Rohde AM, Behnke M, et al. Colonization with third-generation cephalosporin-resistant Enterobacteriaceae on hospital admission: prevalence and risk factors. *J Antimicrob Chemother*. 2016;71(10):2957-2963.
12. Huizinga P, van den Bergh MK, van Rijen M, Willemsen I, van 't Veer N, Kluytmans J. Proton pump inhibitor use is associated with extended-spectrum beta-lactamase-producing Enterobacteriaceae rectal carriage at hospital admission: a cross-sectional study. *Clin Infect Dis*. 2017;64(3):361-363.
13. Kuenzli E, Jaeger VK, Frei R, et al. High colonization rates of extended-spectrum beta-lactamase (ESBL)-producing Escherichia coli in Swiss travellers to South Asia- a prospective observational multicentre cohort study looking at epidemiology, microbiology and risk factors. *BMC Infect Dis*. 2014;14:528.
14. Latour K, Huang TD, Jans B, et al. Prevalence of multidrug-resistant organisms in nursing homes in Belgium in 2015. *PLoS One*. 2019;14(3):e0214327.
15. Lee H, Han SB, Kim JH, Kang S, Durey A. Risk factors of urinary tract infection caused by extended spectrum beta-lactamase-producing Escherichia coli in emergency department. *The Am J Emerg Med*. 2018;36(9):1608-1612.
16. McNeil SA, Malani PN, Chenoweth CE, et al. Vancomycin-resistant enterococcal colonization and infection in liver transplant candidates and recipients: a prospective surveillance study. *Clin Infect Dis*.

2006;42(2):195-203.

17. Okamoto K, Lin MY, Haverkate M, et al. Modifiable risk factors for the spread of *Klebsiella pneumoniae* carbapenemase-producing Enterobacteriaceae among long-term acute-care hospital patients. *Infect Control Hosp Epidemiol*. 2017;38(6):670-677.
18. Östholm-Balkhed A, Tarnberg M, Nilsson M, Nilsson LE, Hanberger H, Hallgren A. Travel-associated faecal colonization with ESBL-producing Enterobacteriaceae: incidence and risk factors. *J Antimicrob Chemother*. 2013;68(9):2144-2153.
19. Prasad N, Labaze G, Kopacz J, et al. Asymptomatic rectal colonization with carbapenem-resistant Enterobacteriaceae and *Clostridium difficile* among residents of a long-term care facility in New York City. *Am J Infect Control*. 2016;44(5):525-532.
20. Puzniak LA, Mayfield J, Leet T, Kollef M, Mundy LM. Acquisition of vancomycin-resistant enterococci during scheduled antimicrobial rotation in an intensive care unit. *Clin Infect Dis*. 2001;33(2):151-157.
21. Reuland EA, Al Naiemi N, Kaiser AM, et al. Prevalence and risk factors for carriage of ESBL-producing Enterobacteriaceae in Amsterdam. *J Antimicrob Chemother*. 2016;71(4):1076-1082.
22. Rodríguez-Baño J, López-Cerero L, Navarro MD, Díaz de Alba P, Pascual A. Faecal carriage of extended-spectrum beta-lactamase-producing *Escherichia coli*: prevalence, risk factors and molecular epidemiology. *J Antimicrob Chemother*. 2008;62(5):1142-1149.
23. Seekatz AM, Bassis CM, Fogg L, et al. Gut microbiota and clinical features distinguish colonization with *Klebsiella pneumoniae* carbapenemase-producing *Klebsiella pneumoniae* at the time of admission to a long-term acute care hospital. *Open Forum Infect Dis*. 2018;5(8):ofy190.
24. Slaughter S, Hayden MK, Nathan C, et al. A comparison of the effect of universal use of gloves and gowns with that of glove use alone on acquisition of vancomycin-resistant enterococci in a medical intensive care unit. *Ann Intern Med*. 1996;125(6):448-456.
25. Søggaard M, Heide-Jorgensen U, Vandenbroucke JP, Schonheyder HC, Vandenbroucke-Grauls C. Risk factors for extended-spectrum beta-lactamase-producing *Escherichia coli* urinary tract infection in the community in Denmark: a case-control study. *Clin Microbiol Infect*. 2017;23(12):952-960.
26. Tan D, Htun HL, Koh J, et al. Comparative epidemiology of vancomycin-resistant enterococci colonization in an acute-care hospital and its affiliated intermediate- and long-term care facilities in Singapore. *Antimicrob Agents Chemother*. 2018;62(12).
27. Vading M, Kabir MH, Kalin M, et al. Frequent acquisition of low-virulence strains of ESBL-producing *Escherichia coli* in travellers. *J Antimicrob Chemother*. 2016;71(12):3548-3555.
28. Wielders CCH, van Hoek A, Hengeveld PD, et al. Extended-spectrum beta-lactamase- and pAmpC-producing Enterobacteriaceae among the general population in a livestock-dense area. *Clin Microbiol Infect*. 2017;23(2):120.e121-120.e128.
